# Supplementary material
Source: PubMed Central journal article supplement (PMC3677569)
Supplement: NIHMS474895-supplement-1.pdf [file NIHMS474895-supplement-1.pdf]

1 **Supplementary information for:**

2 **The genome of the platyfish, *Xiphophorus maculatus***

3 Manfred Schartl<sup>1,2\*+</sup>, Ronald B. Walter<sup>3+</sup>, Yingjia Shen<sup>3</sup>, Tzintzuni Garcia<sup>3</sup>, Julian Catchen<sup>4</sup>, Angel  
4 Amores<sup>4</sup>, Ingo Braasch<sup>1,4</sup>, Domitille Chalopin<sup>5</sup>, Jean-Nicolas Volf<sup>5</sup>, Klaus-Peter Lesch<sup>6</sup>, Angelo  
5 Bisazza<sup>7</sup>, Pat Minx<sup>8</sup>, LaDeana Hillier<sup>8</sup>, Richard K. Wilson<sup>8</sup>, Susan Fuerstenberg<sup>9</sup>, Jeffrey Boore<sup>9</sup>,  
6 Steve Searle<sup>10</sup>, John H. Postlethwait<sup>4</sup> and Wesley C. Warren<sup>8\*</sup>

7  
8 <sup>1</sup>Physiological Chemistry, University of Würzburg, Biozentrum, Am Hubland, and <sup>2</sup>Comprehensive  
9 Cancer Center, University Clinic Würzburg, Josef Schneider Straße 6, 97074 Würzburg, Germany,  
10 <sup>3</sup>Department of Chemistry and Biochemistry, 419 Centennial Hall, Texas State University, 601  
11 University Drive, San Marcos, TX 78666, USA. <sup>4</sup>Institute of Neuroscience, University of Oregon,  
12 1425 E. 13th Avenue, Eugene, OR 97403 USA, <sup>5</sup>Institut de Génomique Fonctionnelle de Lyon, Unité  
13 Mixte de Recherche 5242, Centre National de la Recherche Scientifique/Université de Lyon I/ Ecole  
14 Normale Supérieure de Lyon, 46 allée d'Italie Lyon, France, <sup>6</sup>Division of Molecular Psychiatry,  
15 Department of Psychiatry, Psychosomatics and Psychotherapy, University Clinic Würzburg,  
16 Fuchsleinstraße 15, 97080 Würzburg, Germany, <sup>7</sup>Department of General Psychology, University of  
17 Padua, Via Venezia 8, 35131 Padua, Italy, <sup>8</sup>The Genome Institute, Washington University School of  
18 Medicine, 4444 Forest Park Blvd., St Louis, MO 63108, USA, <sup>9</sup>Genome Project Solutions, 1024  
19 Promenade Street, Hercules, CA, USA, <sup>10</sup>European Bioinformatics Institute, Wellcome Trust Genome  
20 Campus, Hinxton Cambridge CB10 1SD, UK.

21  
22 +These authors have contributed equally to the work

23 \*Corresponding author

|    |                              |
|----|------------------------------|
| 1  |                              |
| 2  |                              |
| 3  |                              |
| 4  |                              |
| 5  |                              |
| 6  | Supplementary Material       |
| 7  |                              |
| 8  | Table of Contents            |
| 9  | Supplementary Notes          |
| 10 | Supplementary Tables 1 to 15 |
| 11 | Supplementary Figures 1 to 9 |
| 12 | Supplementary References     |

13 **Table of Contents**

|    |                                                                                                  |           |
|----|--------------------------------------------------------------------------------------------------|-----------|
| 14 | <b>SUPPLEMENTARY NOTE</b> .....                                                                  | <b>4</b>  |
| 15 | Genome sequencing and assembly.....                                                              | 4         |
| 16 | Transcriptome sequencing and annotation .....                                                    | 6         |
| 17 | Gene Models and annotation.....                                                                  | 7         |
| 18 | Estimation of gene number by transcriptome similarity .....                                      | 11        |
| 19 | Estimation of novel, platyfish-specific genes.....                                               | 11        |
| 20 | Non-coding RNAs .....                                                                            | 14        |
| 21 | Transposable elements.....                                                                       | 14        |
| 22 | Construction of a high-density meiotic map and anchoring of sequence contigs.....                | 15        |
| 23 | Assigning genome contigs to the genetic map.....                                                 | 16        |
| 24 | Analyses of viviparity genes.....                                                                | 17        |
| 25 | Post-TGD analysis of gene families.....                                                          | 19        |
| 26 | Potential biases in gene categories accounting for TGD paralog retention.....                    | 20        |
| 27 | <b>SUPPLEMENTARY TABLES</b> .....                                                                | <b>22</b> |
| 28 | Supplementary Table 1: Assembly statistics for the platyfish genome.....                         | 22        |
| 29 | Supplementary Table 2: Diversity of transposable elements in fish.....                           | 23        |
| 30 | Supplementary Table 3: Comparison of the genome size and the percentage of                       |           |
| 31 | transposable elements (TEs) in different vertebrate species.....                                 | 24        |
| 32 | Supplementary Table 4: Location of pigmentation genes on X chromosome .....                      | 25        |
| 33 | Supplementary Table 5: Viviparity related genes tested for positive selection <sup>a</sup> ..... | 26        |
| 34 | Supplementary Table 6: Test in mammals for selection of viviparity genes positively              |           |
| 35 | selected in livebearing fish <sup>a</sup> .....                                                  | 39        |
| 36 | Supplementary Table 7: List of cognition, pigmentation and liver genes used for post-TGD         |           |
| 37 | retention rate analyses .....                                                                    | 40        |
| 38 | Supplementary Table 8A: Human genes that show copy number variations (CNV).....                  | 51        |
| 39 | Supplementary Table 8B: Zebrafish genes that show copy number variations (CNV) .....             | 51        |
| 40 | Supplementary Table 9: Human genes being members of protein complexes that have                  |           |
| 41 | corresponding TGD paralogs or singletons in the three fish functional categories.....            | 52        |
| 42 | Supplementary Table 10: Lengths of human proteins that have corresponding TGD                    |           |
| 43 | paralogs or singletons in the three fish functional categories .....                             | 53        |
| 44 | Supplementary Table 11. Non-coding RNAs in the genome and in the transcriptome.....              | 53        |
| 45 | Supplementary Table 12. tRNA statistics in the genome assembly .....                             | 54        |
| 46 | Supplementary Table 13. Transcript reads used for Tophat gene models.....                        | 55        |
| 47 | Supplementary Table 14. Tree taxon IDs and cluster codes .....                                   | 56        |
| 48 | Supplementary Table 15. Quantity of clusters of different sizes when clustered by a              |           |
| 49 | distance of 1kb .....                                                                            | 57        |

|    |                                                                                             |           |
|----|---------------------------------------------------------------------------------------------|-----------|
| 1  | <b>SUPPLEMENTARY FIGURES</b> .....                                                          | <b>58</b> |
| 2  | Supplementary Figure 1: Phylogenetic tree of <i>X. maculatus</i> Long Interspersed Nuclear  |           |
| 3  | Elements (LINE) based on reverse transcriptase alignment .....                              | 58        |
| 4  | Supplementary Figure 2: Phylogenetic tree of <i>X. maculatus</i> Long Terminal Repeat (LTR) |           |
| 5  | retroelements based on reverse transcriptase alignment .....                                | 59        |
| 6  | Supplementary Figure 3: Phylogenetic tree of <i>X. maculatus</i> DNA transposons based on   |           |
| 7  | transposase alignment.....                                                                  | 60        |
| 8  | Supplementary Figure 4: Split conservation of chromosomal location between platyfish        |           |
| 9  | and medaka or stickleback chromosomes .....                                                 | 61        |
| 10 | Supplementary Figure 5: Posterior probabilities for viviparity genes under positive         |           |
| 11 | selection using branch site model .....                                                     | 62        |
| 12 | Supplementary Figure 6: Analysis of paralog retention rate after the teleost genome         |           |
| 13 | duplication (TGD) .....                                                                     | 67        |
| 14 | Supplementary Figure 7: Protein length analysis.....                                        | 68        |
| 15 | Supplementary Figure 8: Whole genome assembled scaffold distribution by base length..       | 69        |
| 16 | Supplementary Figure 9: Species tree used for the PHRINGE analysis.....                     | 69        |
| 17 | <b>SUPPLEMENTARY REFERENCES</b> .....                                                       | <b>70</b> |
| 18 |                                                                                             |           |

19

20

# 1 SUPPLEMENTARY NOTE

2

## Genome sequencing and assembly

3 *Sequencing:* The platyfish genome was sequenced using deep sequencing methods supplied  
4 through the Roche 454 and Illumina technologies. For this approach fragment and long insert  
5 paired libraries of 3 and 20kb were prepared according to Roche recommended methods.  
6 Illumina paired end libraries of insert size 200bp and 75 base pair read length were created  
7 according the manufacturers recommendations. In addition to the shotgun sequencing  
8 strategy a physical map indicating tiling paths of *Xiphophorus maculatus* contigs was  
9 constructed by generating fingerprints from the WLC-1247 BAC library. The physical map  
10 consists of 43,192 BAC clones.

11 *Assembly:* To assemble the platyfish genome first two independent assemblies were built  
12 using the Newbler and PCAP<sup>1</sup> algorithms from ~19.6X total sequence coverage. Then the  
13 Newbler and the PCAP assemblies were merged. As a result of this merge a total of 23,144  
14 contigs were added to the Newbler assembly (~7Mb), thus increasing the final contig and  
15 supercontig length. Redundant reads found in contigs were removed and then all contigs were  
16 renamed. The final merged assembly (Supplementary Table 1), referred to as platyfish 4.4  
17 contained 130,963 contigs with an N50 contig and supercontig length of 21kb and 1.1Mb,  
18 respectively (Supplementary Figure 8). The N50 contiguity statistic denotes the percentage of  
19 the assembled genome that is of that base length or greater. Platyfish 4.4 was screened for  
20 sequence contamination from other organisms by our group and NCBI that resulted in the  
21 removal of 410 contigs. A total of 669Mb was assembled in contigs. Previous estimates of  
22 genome size from flow cytometry range from 750 to 950 Mb<sup>2,3</sup>.

1 *Assembly consensus base error correction:* The pyrosequencing chemistry method used by  
2 454 Titanium instruments causes false insertions and deletions within homopolymer regions  
3 of the genome. To correct these, we generated from the same DNA source used for the  
4 reference assembly 101 million Illumina reads (75 base paired-end reads, insert size 200bp).  
5 These reads were trimmed using stringent criteria for sequence quality (less than 0.01 chance  
6 of error, containing no more than 2 ambiguous nucleotides, retaining a length after trimming  
7 of at least 20 bases). This retained a dataset of 94 million reads, for an average coverage of  
8 7.4x of the assembled genome. To each of the contigs that comprised the set of 454  
9 supercontigs, we aligned all trimmed reads using the Genomics Workbench v.4.03 software  
10 (CLC Bio). For any contig shorter than 8 kb, we included in these alignments the contigs  
11 themselves to ensure all regions were covered by the reference alignment by at least one read.  
12 Software limitations precluded this for contigs 8kb or longer, so these were shredded *in silico*  
13 into fragments of 60 bases, which were then included in the reference alignments for the same  
14 purpose along with the Illumina reads. A consensus sequence was then created that factored  
15 the quality scores of both the 454 assembly and the individual Illumina reads. Then these  
16 contigs were joined back together into the supercontigs as originally structured by joining  
17 them in the same order and orientation and adding back the same number of N's in the gaps  
18 as had been inferred for the supercontigs by the paired-end information. Based on manual  
19 examination of a small subset of the data, this process appears to have corrected about  
20 373,000 bases within the Platyfish 454-based 4.4 assembly, mostly deletions in  
21 homopolymeric regions.

22 *Assembly accuracy:* To examine putative misassemblies due to false de novo joins during  
23 assembly graph construction we utilized a high density meiotic map described below in the  
24 section entitled: Assigning genome contigs to the genetic map. Using 14,391 marker  
25 sequences, we could reliably align 1,950 scaffolds to all linkage groups. Of these, 231

1 scaffolds mapped to multiple linkage groups, suggesting a misassembly event and were  
2 manually split. A total of 576 splitting events occurring on 231 of these scaffolds increased  
3 the final number of scaffolds to 2,288. The great majority of the splitting events, 163 of them,  
4 were split into two pieces, with a much smaller number of cases had to be split into multiple  
5 pieces. Overall these detected misassembly events (11%) are similar in scope and structure to  
6 what we have observed for other large genome projects.

7

### **Transcriptome sequencing and annotation**

8 The *X. maculatus* transcriptome (version\_4) was assembled from RNA isolated from tissues  
9 including heart, liver, brain, ovaries, and testes, as well as from embryonic stages 15 and 25.  
10 The raw reads were filtered using a custom filtration method<sup>4</sup> which resulted in  
11 265,833,281 paired-end reads. The short reads were then aligned to the genome contigs using  
12 Bowtie[4]<sup>5</sup>, then assembled using the Velvet/Oases package by testing all odd k-mer sizes  
13 from 31 to 59 nt. A broad peak was observed in the N50 scores, when plotted as a function of  
14 k-mer size, for the assembled sequences over 500bp in the k-mer size range of 31 to 39bp.  
15 The k-mer size of 37 was on the upper end of this range before a more significant drop-off  
16 began so it was selected as a representative assembly. To begin to remove likely erroneous  
17 transcripts, short reads were mapped to the 495,520 assembled transcripts and only sequences  
18 with 5 or more mapped reads were kept. The resulting sequences contained 151,079  
19 transcripts with an N50 of 2,978 bp and average length of 1705 bp. The transcriptome is  
20 available in genome browser format at [http://avogadro.tr.txstate.edu/cgi-](http://avogadro.tr.txstate.edu/cgi-bin/gb2/gbrowse/XM_ncbi442/)  
21 [bin/gb2/gbrowse/XM\\_ncbi442/](http://avogadro.tr.txstate.edu/cgi-bin/gb2/gbrowse/XM_ncbi442/) and as a FASTA bulk sequence file at  
22 [http://avogadro.tr.txstate.edu/Xiph\\_data\\_link/stable/Xm\\_transcriptome\\_v4.0/](http://avogadro.tr.txstate.edu/Xiph_data_link/stable/Xm_transcriptome_v4.0/).

1 For the *X. hellerii* transcriptome, RNA from 1 month old whole fish, and from brain, liver,  
2 ovaries and testes of mature fishes was sequenced. After custom filtration <sup>4</sup>, 173 million  
3 paired reads and 22 million singletons were used for transcriptome development. We then  
4 used Velvet <sup>6</sup> to guide the assembly using combined paired-end and singleton reads. We first  
5 used all odd k-mer sizes from 21 bases to 49 bases and compared assemblies produced from  
6 different k-mer sizes to identify the assembly with the longest N50 length. In the final result,  
7 we used a hash length (k-mer size) of 35 bases. We employed Oases  
8 (<http://www.ebi.ac.uk/~zerbino/oases/>) to perform the final assembly and reporting of  
9 putative transcripts and splice variants using a coverage cutoff of 4, an insert length estimate  
10 of 120, and other parameters at default values. The final assembly has 42,675 transcripts with  
11 an N50 of 3,280bp, an average length of 1,991bp and a total size of 483Mb.

12

### **Gene Models and annotation using PHRINGE**

13 Gene identification analysis was performed within all corrected supercontigs. The primary  
14 method relied on evidence from large amounts of RNA-seq data. Reads from the  
15 transcriptome sequencing were trimmed to eliminate all reads with any ambiguous base calls  
16 (e.g., N) and any that failed to meet the prescribed length as defined by the number of cycles.  
17 The next step at gene finding requires sets of data of identical read length. These trimmed  
18 reads were then aligned to the sequence-corrected supercontigs using Bowtie <sup>5</sup>, then this  
19 alignment was adjusted for the most likely exon-intron boundaries using TopHat <sup>7</sup>, and then  
20 gene models created using Cufflinks <sup>8</sup>. This process created a large number of potential  
21 transcript sequences, ranging from 33,374 to 90,314 among the various conditions analyzed  
22 (Supplementary Table 13). Only those transcripts containing a complete ORF and a transcript  
23 read coverage of at least 3x were retained, and these were reconciled into a single set of

1 33,756 unique potential protein-encoding genes. Additional evidence was found by *ab initio*  
2 modeling using Augustus <sup>9</sup> that had been trained on the medaka gene set and on the alignment  
3 of full-length gene models of medaka and zebrafish (both from Ensembl) using BLATX <sup>10</sup>.  
4 All of these models can be viewed as separate tracks in genome browser format at  
5 [http://avogadro.tr.txstate.edu/cgi-bin/gb2/gbrowse/XM\\_ncbi442/](http://avogadro.tr.txstate.edu/cgi-bin/gb2/gbrowse/XM_ncbi442/).

6 These gene models were further culled to a subset of 17,783 that are especially reliable and  
7 amenable to phylogenetic analysis for entry into a whole genome evolutionary interpretation  
8 using the PHRINGE (Phylogenetic Resources for the Interpretation of Genomes) system  
9 ([http://genomeprojectsolutions.com/PHRINGE\\_pipeline.html](http://genomeprojectsolutions.com/PHRINGE_pipeline.html)) by eliminating any transcripts  
10 shorter than 300 nucleotides and retaining only the longest version of any splice variant at  
11 each locus. PHRINGE creates a graph with all inferred protein sequences as nodes, with  
12 edges formed from distance scores calculated from their full length alignments, then  
13 PHRINGE clusters these sequences into gene families using a method that considers the  
14 evolutionary relationships among the organisms (Supplementary Figure 9), then performs a  
15 phylogenetic analysis for each cluster (Supplementary Table 14). A separate analysis is  
16 conducted at each node of the tree of these species (called a “cluster level”) so that the user  
17 can choose to see the sets of gene relationships at only the more shallow levels, where it may  
18 be more accurate, or at the deeper levels, where it will be more comprehensive. This  
19 procedure allows the most accurate possible assignment of orthologous and paralogous  
20 relationships, and reconstruction of gene duplications and losses. Users can see the multiple  
21 sequence alignments and phylogenetic trees of all genes, search using keywords, compare  
22 intron-exon structures, and see the relative arrangements of homologs across all genomes in  
23 the PHRINGE database. This comparison of the culled subset of 17,783 *Xiphophorus* genes  
24 with gene sets of 11 other animals is available at <http://xiphophorus.genomeprojectsolutions->



1 [databases.com/](http://databases.com/) and as FASTA bulk files at  
2 [http://avogadro.tr.txstate.edu/Xiph\\_data\\_link/stable/Xm\\_JB\\_gene\\_models/](http://avogadro.tr.txstate.edu/Xiph_data_link/stable/Xm_JB_gene_models/).

3 From *Danio rerio* 28,630 genes, from *Gasterosteus aculeatus* 27,576 genes, from *Tetraodon*  
4 *nigroviridis* 27,918 genes, from *Oryzias latipes* 24,661 genes, and from *Xiphophorus*  
5 *maculatus* 17,783 genes were entered into the PHRINGE analysis. Of the *Xiphophorus* genes,  
6 PHRINGE found a total of 15,676 to be clearly homologous to one or more genes of another  
7 considered organism.

8 The comparison that included only the gene sets of *Xiphophorus maculatus* and just its  
9 closest considered relative *Oryzias latipes* (cluster level 11) identified 11,914 gene families.  
10 These 11,914 gene families contain 13,384 *Xiphophorus* genes (from 1 to 40 genes in each  
11 family) and 16,973 *Oryzias* genes (from 1 to 37 genes in each family except for a single  
12 family with 175 members). Of the 11,914 gene families, 8,280 gene families have exactly 1  
13 gene in each of the two species. We consider these as most likely 1:1 orthologs.

14 By way of comparison, the analysis that includes only the genes sets of the *Gasterosteus*  
15 *aculeatus* gene set and its closest considered relative *Tetraodon nigroviridis* (cluster level 10)  
16 identified 16,238 gene families. This contains 23,609 *Gasterosteus* genes (from 1 to 84 genes  
17 in each family except for a single family with 244 members) and 18,945 *Tetraodon* genes  
18 (from 1 to 38 genes in each family). Of the 16,238 gene families, 10,207 gene families have  
19 exactly 1 gene in each of the two species the culled subset of 17,783.

20 At a deeper level (cluster level 9), the comparison that includes the gene sets of all four fish,  
21 with a clade of *Xiphophorus maculatus* plus *Oryzias latipes* being reciprocally the outgroup  
22 to the clade of *Gasterosteus aculeatus* plus *Tetraodon nigroviridis*, there are 22,249 gene  
23 families identified. This comparison contains 12,847 *Xiphophorus* genes (from 0 to 32 genes  
24 in each family), 19,910 *Oryzias* genes (from 0 to 56 genes in each family), 22,171

1 *Gasterosteus* genes (from 0 to 38 genes in each family except for three families with 70, 120,  
2 and 157 members), and 14,488 *Tetraodon* genes (from 0 to 53 genes in each family). Of the  
3 22,249 gene families, 10,836 have a homolog in *Oryzias* and one or more of *Gasterosteus* and  
4 *Tetraodon* but not in *Xiphophorus*. Only 239 gene families have exactly 1 gene in each of the  
5 four species, perhaps owing to the rampant and differing gene losses after whole genome  
6 duplications.

7

## 8 **Gene annotation using Ensembl genebuild**

9 Assembly Xipmac4.4.2 (GenBank Assembly ID GCA\_000241075.1;  
10 [http://www.ncbi.nlm.nih.gov/genome/assembly/?term=GCA\\_000241075.1](http://www.ncbi.nlm.nih.gov/genome/assembly/?term=GCA_000241075.1)) was annotated  
11 for protein coding genes using the Ensembl genebuild procedure. Gene models were based on  
12 1.) Genewise alignments of UniProt protein sequences from platyfish, 2.) models build from  
13 platyfish RNASeq data using the Ensembl RNASeq pipeline, 3.) Genewise alignments of  
14 UniProt protein sequences from other fish and vertebrate species, and 4.) exonerate  
15 alignments of Ensembl Stickleback and Zebrafish proteins from Ensembl release 65. The  
16 protein-coding models were extended into their untranslated regions using RNASeq models.  
17 In addition to the coding transcript models, non-coding RNAs and pseudogenes were  
18 annotated. This resulted in 20,366 protein-coding genes, 348 non-coding genes and 28  
19 pseudogenes, giving a total of 20,817 gene transcripts. The annotated platyfish genome can  
20 be found at [http://www.ensembl.org/Xiphophorus\\_maculatus/Info/Index](http://www.ensembl.org/Xiphophorus_maculatus/Info/Index).

21

### **Estimation of gene number by transcriptome similarity**

1 To estimate the number of protein coding genes in the platyfish genome, the Jp163A  
2 reference transcriptome was analyzed by performing reciprocal best-hit BLAST comparisons  
3 against assembled transcript sequences from *O. latipes*, *G. aculeatus*, *T. nigroviridis*, *T.*  
4 *rubripes*, *D. rerio*, and *H. sapiens* retrieved from the Ensembl database. This analysis  
5 produced a BLAST reciprocal best-hit (RBHB) reference library containing 20,105 cDNA  
6 sequences. This approach allows several representations of some genes, since the transcript  
7 assembly process may construct alternative transcript forms that may all have best hits to  
8 similar sequences in any of the other species. To control for this, we grouped alternatively  
9 assembled sequences that were reported by Oases<sup>11</sup> to have a common origin (i.e., the same  
10 “locus” number), and then only included the unique 'locus' numbers from a group. This  
11 grouping produced an estimated 15,431 unique genes.

12

### **Estimation of novel, platyfish-specific genes**

13 We searched the *X. maculatus* genome for evidence of novel, active genes or those that may  
14 not be well enough conserved for identification using homology-based searches. We  
15 compared the assembled Jp163A transcriptome against medaka and stickleback  
16 transcriptomes as reference sets and created a set of transcripts found in both *X. maculatus*  
17 and either medaka or stickleback transcriptomes. We employed BLAST<sup>12,13</sup> searches in  
18 amino acid space using TBLASTX to detect divergent yet related sequences at a similarity  
19 threshold of  $E < 10^{-10}$  in both directions. This search identified 1,638 stickleback and 1,436  
20 medaka sequences that did not have hits and thus may be absent from the *X. maculatus*  
21 transcriptome. In addition this search produced approximately 70,000 *X. maculatus* contigs  
22 that did not match either the medaka or stickleback reference set. This quantity of apparently

1 unique *X. maculatus* sequences is improbably large and may contain non-coding RNAs,  
2 misassemblies, fragments, or other artifacts that do not represent novel, active protein-coding  
3 genes. The reference set of similar sequences (RSS) included 81,188 *X. maculatus* transcripts  
4 similar to medaka and 80,761 transcripts similar to stickleback (many of these overlap) based  
5 on the BLAST hits.

6 To reduce the impact of artifact sequences, we grouped the *X. maculatus* sequences to create  
7 clusters that represented all the sequence alternatives for a common gene product. To group  
8 the *X. maculatus* sequences together, we performed a self-BLAST of the entire set of *X.*  
9 *maculatus* transcripts using TBLASTN with an E-value threshold of  $10^{-10}$ . We then clustered  
10 sequences based on hits in these results. Any hit with an identity of 95% or greater was added  
11 to a similarity cluster with the hit sequence. Once the self-similar clusters were created, we  
12 sorted them based on whether the cluster was represented in the RSS. Sequences from any  
13 cluster with at least one *X. maculatus* sequence that hit a medaka or stickleback reference  
14 sequence were all taken to be related to that reference sequence, and were not considered  
15 candidates for novel, active *X. maculatus* genes. The *X. maculatus* clusters with no hits to  
16 medaka contained 31,286 sequences in 27,236 clusters and those with no hits to stickleback  
17 contained 30,444 sequences in 26,730 clusters. Clusters with hits to both medaka and  
18 stickleback contained 78,269 sequences in 24,550 clusters. Clusters with no hits to either set  
19 contained 28,487 sequences in 25,384 clusters; this is the “no hit” pool most likely to include  
20 novel, active *X. maculatus* genes.

21 To filter out sequences that were not likely to represent protein-coding transcripts we mapped  
22 all transcripts from the “no-hit” pool to the *X. maculatus* genome and predicted likely coding  
23 sequence regions. We used the GMAP program <sup>14</sup> to align each of the unmatched *X.*  
24 *maculatus* sequences to the genome. GMAP detects the location and boundaries of exons and

1 predicts a coding region. We used this to further screen the sequences that mapped to the  
2 genome by keeping only those transcripts that had a total coding sequence >300 bases and  
3 >99% of the transcript directly mapped to the genome. This filtration regimen reduced the  
4 candidate pool to 5,570 putative protein-coding transcripts with no match to medaka and  
5 5,066 with no match to stickleback. 4,313 of these *X. maculatus* sequences are different from  
6 both medaka and stickleback, and those formed 3,964 clusters; these sequences are candidates  
7 to be novel, active genes.

8 We BLASTX searched the above 4,313 transcripts against the NCBI NR database and found  
9 hits for 639 sequences at an E-value threshold of  $10^{-10}$ . Of these 639 sequences, 122 had been  
10 removed from GenBank due to "standard genome annotation processing" and 73 were  
11 duplicates. The remaining 404 NCBI NR hits gave 315 that carried at least one uncertainty  
12 term in its description (e.g., hypothetical, unnamed, or novel predicted). Thus, after removing  
13 the 639 sequences from the 4,313 *X. maculatus* sequences different from both medaka and  
14 stickleback, 3,674 transcripts in 3,416 clusters remained as an estimated pool of novel  
15 sequences in the *X. maculatus* transcriptome.

16 However, some of these sequences might represent parts of the same transcript that had not  
17 been joined properly during the transcriptome assembly. We therefore sought to cluster the  
18 remaining 3,674 transcriptome contigs differently, by physical distance in the genome. We  
19 examined inter-genic and inter-exonic distances in zebrafish, medaka, and stickleback (gene  
20 annotations retrieved from Ensembl, release 67) and found that, generally, 48-82% of inter-  
21 exonic distances were 1kb or less, but in all three fish, some distances were well over 100kb.  
22 Inter-genic distances, however, were such that 17% of neighboring zebrafish genes fall within  
23 1kb of one another and 30% of neighboring genes are within a 2kb range. Thus, we selected a  
24 distance of 1kb to cluster the remaining *X. maculatus* sequences into likely gene groups, since

1 at the 1kb range the grouped sequences are more likely to be fragments of the same gene than  
2 they are to represent separate genes. This reasoning was further supported when the members  
3 of each cluster contained sequences with similar locus numbers as assigned by the Oases  
4 assembler. Similar locus numbers indicate the sequences are closely related by links in the  
5 DeBruijn graph representation, but may have been connected by a low-coverage region. Of  
6 the 156 clusters with 2 or more sequences, 136 had a locus number range of 3 or less. The  
7 quantity of clusters of different sizes (i.e., sequences per cluster) at a 1kb clustering distance  
8 is shown in Supplementary Table 15. In total, 3,482 distance-clusters were formed, with 156  
9 having more than one member. This quantity is similar to the 3,416 clusters formed earlier  
10 through sequence similarity, and thus serve to corroborate the results.

11

### **Non-coding RNAs**

12 A total of 1,464 non-coding RNAs were annotated by software prediction (Supplementary  
13 Table 11). Approximately half of the rRNAs, snRNAs and snoRNAs species could be  
14 confirmed from the transcriptome. 611 micro-RNAs were predicted. We identified 535 tRNA  
15 genes that represent 49 different anticodon loops. The number of tRNA genes per codon  
16 ranges from 1 to 137 (Supplementary Table 12).

17

### **Transposable elements**

18 For annotation of transposable elements (TE) first a combined library containing 7257  
19 sequences from both manual (119 sequences, from 366 to 20,400 nucleotides) and automatic  
20 annotation (7138 sequences, from 50 to 2,835 nucleotides) was produced. This inventory  
21 masked about 16% of the genome. Within the repeat fraction TEs make up about 5% of the

1 genome of *X. maculatus*, in accordance with a relatively compact genome (Supplementary  
2 Tables 2-3). This TE content is only marginally higher than the values from the compact  
3 genomes of pufferfishes and is in the range of the chicken<sup>15,16</sup>. Despite a high diversity of TE  
4 families, none of them is highly repeated in the genome, usually in the range of 1-10  
5 complete copies. One of the highest repeated elements is the non-autonomous MIToy (more  
6 than 500 copies). A considerable fraction of these elements share more than 97% nucleotide  
7 (nt) similarity, suggesting a recent transposition activity of this element.

8 The foamy virus sequence of the platyfish was initially detected on the sex chromosome. The  
9 sequence includes LTRs and specific Gag, Pol and Env ORFs, with a total length of 17,027  
10 nucleotides. At least two complete copies were identified in this region, with more than 95%  
11 sequence identity. The whole genome contains more than 30 copies (>85% identity), but only  
12 the copies in one region of the sex chromosome are complete. Looking more precisely at each  
13 copy and solo-LTR, a TG preference for insertion was determined. Searching for possible  
14 endogenous foamy virus sequences in other vertebrate genomes was performed on the  
15 Ensembl versions of the chicken, zebrafish, green anole, *Xenopus*, and all teleost genomes.  
16 A new sequence was identified in the cod genome (contig 24163). The predicted protein  
17 corresponds to a foamy reverse transcriptase and clearly groups within the foamy branch. A  
18 more complete foamy virus sequence could not be identified because of short contig lengths  
19 in the cod genome.

20

## 21 **Construction of a high-density meiotic map and anchoring of sequence contigs**

22 To obtain a high density meiotic map the RAD-tag methodology was used from a mapping  
23 cross DNA panel consisting of 267 individuals. The sequence for each of the initial set of  
24 18,119 polymorphic RAD-tags was mapped onto sequenced genome contigs and each of the

1 markers was annotated by the Synteny Database <sup>17</sup>. In addition, the set of sequences  
2 surrounding microsatellites from a previous genetic map <sup>18</sup> were identified in genomic  
3 contigs and those contigs containing both mapped microsatellites and mapped RAD-tags  
4 were associated to the RAD-tag map, thus providing anchor markers. Because JoinMap  
5 couldn't initially handle our huge number of markers, the data set was partitioned into  
6 two overlapping subsets, with each set containing the common anchor markers. The  
7 Kosambi mapping function and JoinMap's maximum likelihood mapping algorithm  
8 grouped markers at an initial LOD threshold of 15.0. After this initial mapping of  
9 markers to individual LGs, markers were divided into 3 groups of 8 different LGs each.  
10 Subsequent linkage mapping analysis for individual LGs was performed at a LOD=30.0.  
11 Suspicious double recombinants were reevaluated by visually inspecting reads in Stacks  
12 and manually correcting of the genotype if necessary.

13

### **Assigning genome contigs to the genetic map**

14 After exclusion of 1794 conflicting markers a total 14391 markers were mapped. Markers from the  
15 genetic map were aligned against the platyfish genome by using GSnap <sup>19</sup> to align the nucleotide  
16 sequences of mapped RAD-tag markers against the genome contigs. Contigs that contained a single  
17 mapped RAD-tag marker were ordered along the chromosome, but with a single anchor point, their  
18 orientation was ambiguous and thus their orientation was randomly selected. When more than one  
19 adjacent mapped RAD-tag marker hit the same contig that contig was not only ordered on the  
20 chromosome but its orientation along the chromosome was certain. When two genetic markers from  
21 independent map positions aligned to the same scaffold, causing the map order to disagree with the  
22 physical order, we prioritized for map order. This type of discrepancy could be caused by two possible  
23 reasons: 1) there is a genome misassembly, or 2) we failed to detect a crossover event. The latter  
24 reason is very unlikely due to the rare occurrence of nearby double crossovers. Therefore, the scaffold



1 was broken into pieces so that the physical order will agree with the genetic map. To break the  
2 scaffold, the nearest contig boundaries to the genetic markers within the scaffold were identified  
3 (since scaffolds are composed of contigs and gaps) and the scaffold was broken at the contig scaffold  
4 boundary. 101 scaffolds mapped to multiple linkage groups. 231 scaffolds were split (total 576  
5 splitting events; 2 fragments: 163 cases; 3 fragments: 44 cases; 4 fragments: 16 cases; 5 fragments: 2  
6 cases; 6 fragments: 4 cases; 7 fragments: 2 cases). Manual examination of splitting causes revealed  
7 that most were due to repeat structures allowing long read pairs to erroneously connect contigs. In  
8 total 2288 scaffolds were mapped from 1950 original scaffolds resulting in 653,124,558bp total map  
9 length.

10 After ordering the physical genome using the genetic map, we consecutively enumerated nucleotides  
11 from the ordered contigs along each chromosome, and then aligned each assembled gene transcript to  
12 its genomic location using BLAT<sup>20</sup> and recorded the maximal start/end coordinates for the gene.  
13 Orthologs of each gene were called by the algorithms of the Synteny Database as described<sup>17</sup>.

14

### **Analyses of viviparity genes**

15 Thirty-four protein-coding genes known to function in yolk production, placenta-related  
16 characteristics, and zona pellucida structures were selected as candidate genes that may be  
17 involved in the evolution of viviparity among *Xiphophorus* fishes (Supplementary Table 5).  
18 For viviparity genes, our selection criteria for gene candidates were as follows: a) The gene is  
19 known to be involved in nutrient provision during early development in oviparous vertebrates  
20 and invertebrates; b) The gene has been identified as coding for an egg envelope protein in  
21 closely related but oviparous fishes; c) The gene is documented to be involved in mammalian  
22 placental development; d) The gene has been proposed to be a driving force in the evolution  
23 of placentation. Eighteen randomly selected genes (Supplementary Table 5) but which to  
24 our knowledge had not been associated in any study so far with viviparity were used for  
25 control.

1 Orthologous sequences for the 34 candidate genes and the 18 control genes from four fish  
2 species (*O. latipes*, *G. aculeatus*, *T. nigroviridis*, *D. rerio*) were retrieved from the Ensembl  
3 database. To identify orthologs in *Xiphophorus*, the cDNAs and genomic sequences to  
4 medaka orthologs were searched against the Jp163A transcriptome or genome using  
5 TBLASTX (E-value cutoff  $10^{-30}$ ). Reciprocal BLAST searching was performed for each  
6 candidate gene to ensure each *Xiphophorus* and medaka homologue were indeed the best hits.  
7 We then used the MAFFT translation alignment (Algorithm G-INS-I) in the Geneious  
8 software package ([www.geneious.com/](http://www.geneious.com/)) to make codon-delimited alignments for each  
9 significant *Xiphophorus* hit and the other four fish species. PAML (version 4.4, linux 64bit)  
10 was implemented to detect positive selection in genes and sites along the *Xiphophorus*  
11 lineages (i.e., *X. maculatus* and *X. hellerii*)<sup>21</sup>. The likelihood of alternative hypothesis (genes  
12 positively selected; model = 2, NSsites = 2) was compared with a null model (fix\_omega=1 and  
13 omega=1), where no positive selection is allowed, using likelihood ratio tests (*chi-square* distribution,  
14 df=1) and *Xiphophorus* sequences were used as foreground. Genes with p-value less than 0.05 from  
15 likelihood ratio tests were designated as positively selected in *Xiphophorus* and the Bayes empirical  
16 Bayes method<sup>22</sup> was further used to calculate the selection pressure at each site. Eight of the 34  
17 viviparity-related genes showed significant values for evolution under positive selection, while none of  
18 the 18 control genes showed signs of positive selection (Supplementary Table 5). Genes identified  
19 with positive selection were searched further using InterProScan for functional motifs. To profile  
20 expression of viviparity genes in *X. maculatus* ovary and liver, we sequenced 60mer pair-end reads  
21 using Illumina GAIIx sequencer. 22.3 and 32.5 million RNA-seq reads were then mapped to *X.*  
22 *maculatus* genome using Bowtie<sup>5</sup> and FPKM (Fragments Per Kilobase of transcript per Million  
23 mapped reads) values were calculated using Cufflink 1.30<sup>7</sup>. Except for 4 placenta genes (*cdx1a*, *cdx4*,  
24 *gcm1*, *mash2*), which did also not show any sign of evolution under positive selection, expression  
25 values were in accordance with a proposed viviparity function (Supplementary Table 5).

26

## Post-TGD analysis of gene families

1 To study whether the platyfish and other teleosts have retained specific categories of genes that are  
2 possibly involved in bringing about the highly complex suites of behavior noted in many fishes we  
3 established a list of cognition-related genes (Supplementary Table 7). Only those genes were included  
4 that are assumed (from human and mouse data) to be involved in brain development and core  
5 cognitive functions and - if dysregulated or mutated in neurodevelopmental, psychiatric or  
6 neurodegenerative disease – are connected to cognitive dysfunction, or have been shown by functional  
7 analysis to be critically involved in neural network connectivity and synaptic plasticity. To produce  
8 such a list of genes primarily involved in cognition, the following criteria were used: We heuristically  
9 considered genes as candidates for cognition, if at least two of the following four criteria were met:  
10 Category A, 1) the gene is known to be involved in the development of brain networks implicated in  
11 cognition (e.g. proliferation, migration and differentiation of glial and/or specific neuronal cells); 2)  
12 the gene has been demonstrated to participate in synapse formation and activity-dependent remodeling  
13 and/or in transsynaptic signaling (e.g. long-term potentiation/depression) and adult brain function,  
14 such as regulators of neurotransmitter systems relevant to cognition circuits (e.g. glutamate signaling);  
15 Category B, 3) the gene was validated as a modulator of cognitive processes in neuropsychological  
16 and psychophysiological paradigms or functional neuroimaging; and 4) the gene has been repeatedly  
17 identified by genome-wide screening approaches as a candidate gene for disorders featuring cognitive  
18 impairment (e.g. intellectual disabilities), deficits in social cognition (e.g. autism and schizophrenia  
19 spectrum disorders) or neurodegenerative disorders with cognitive dysfunction (e.g. Alzheimer's  
20 disease, Parkinson's disease). Genes were further prioritized when cognitive function was altered in a  
21 gene-targeted mouse or other animal model. Although the distinction is prone to a certain degree of  
22 arbitrariness, genes shown to be involved in other domains of brain function and complex behavior,  
23 for example those primarily moderating emotionality or reward-related behavior, were largely  
24 excluded. The gene lists for pigmentation and liver were derived from Braasch et al.<sup>23</sup> (and updated  
25 using criteria therein). The overlap of the three gene categories (cognition/pigmentation/liver) and  
26 their TGD paralog retention rates in *Xiphophorus*, zebrafish, Atlantic cod, stickleback, *Tetraodon*,

1 *Takifugu*, medaka, and the parsimony-inferred teleost ancestor are depicted in Supplementary Figure  
2 6.  
3 .

### **Potential biases in gene categories accounting for TGD paralog retention**

4 We tested whether the differences in TGD paralog retention rate among the three functional categories  
5 (cognition/pigmentation/liver genes) could be accounted for by a bias in categories toward functional  
6 and molecular features that were shown previously to be enriched among genes retained after whole  
7 genome duplications (WGDs).

8 *Dosage sensitivity*: According to the dosage balance hypothesis<sup>24</sup> genes that are dosage sensitive tend  
9 to be retained after WGDs, as for example found for retained ohnologs from the two rounds of early  
10 vertebrate genome duplication<sup>25</sup>. The non-occurrence of copy number variation (CNV) of a gene is  
11 considered to indicate dosage-sensitivity<sup>25</sup>. Here we tested for the occurrence of CNVs in a post-TGD  
12 lineage (zebrafish) and, as a proxy to the pre-TGD condition, a lineage that diverged before the TGD  
13 (human). Following the strategy of Makino and McLysaght<sup>25</sup> we obtained copy number variation  
14 (CNV) data for human genome assembly GRCh37/hg19 from the Database of Genomic Variants  
15 (<http://dgvbeta.tcag.ca/dgv/app/home>; release date 2012-03-29; 462,611 CNV regions). Furthermore,  
16 we obtained more limited CNV data for zebrafish from Brown et al.<sup>26</sup> (4,852 CNV regions, lifted  
17 from genome assembly Zv8 to Zv9). Genomic coordinates of human and zebrafish protein-coding  
18 genes were obtained from Ensembl. We then identified those human and zebrafish “CNV genes”  
19 within our dataset (Supplementary Table 8) defined as those genes that were completely covered by  
20 one or more CNV regions<sup>25</sup>. For both, human and zebrafish, there was neither a significant difference  
21 in the amount of “CNV genes” between singletons and retained TGD paralogs in our dataset nor  
22 among the three different functional categories (cognition/pigmentation/liver genes) (chi-square tests).  
23 *Protein complex membership*: A bias for retained ohnologs in terms of protein complex membership  
24 was previously noted<sup>25</sup>. A list of human protein complex members was obtained from Human Protein  
25 Reference Database ([www.hprd.org](http://www.hprd.org); 1,521 protein complexes). In our dataset (Supplementary Table

1 9), there was no difference in protein complex membership between singletons (117/315 = 37.1%)  
2 and TGD paralogs (74/176 = 42.0%) ( $\chi^2 = 1.142$ , d.f. = 1,  $p = 0.28523$ ), or among the three  
3 functional categories, cognition (80/192 = 41.7%), pigmentation (40/129 = 31.0%), and liver (76/185  
4 = 41.1%) genes ( $\chi^2 = 4.37$ , d.f. = 2,  $p = 0.11248$ ).

5 *Protein length:* Sato et al.<sup>27</sup> found in their dataset a significant bias of TGD-retained paralogs  
6 encoding long (>1,000 amino acids) rather than short (<200 amino acids) proteins using human  
7 proteins as proxies to the ancestral state. In our dataset (Supplementary Table 10), we found a similar  
8 trend comparing TGD-retained paralogs and singletons ( $\chi^2 = 10.711$ , d.f. = 2,  $p = 0.00472$ )  
9 (Supplementary Fig. 7a). Furthermore, there is a significant difference in the distribution among  
10 protein length groups between the three functional categories ( $\chi^2 = 14.132$ , d.f. = 4,  $p = 0.00688$ )  
11 based on the high portion of cognition gene belonging to the long protein category (Supplementary  
12 Fig. 7b). This suggests that the high TGD paralog retention rate of the cognition genes may be based  
13 on their bias toward long proteins. Of note, there is no statistical difference between pigmentation and  
14 liver genes with respect to their protein length distribution ( $\chi^2 = 0.382$ , d.f. = 2,  $p = 0.82613$ ), despite  
15 the fact that significantly higher retention of TGD paralog retention rate for pigmentation compared to  
16 liver genes<sup>28</sup>.

17

## SUPPLEMENTARY TABLES

**Supplementary Table 1: Assembly statistics for the platyfish genome**

| <b>Assembly metric</b>  | <b>Contigs</b> | <b>Scaffolds</b>    |
|-------------------------|----------------|---------------------|
| Total                   | 130,963        | 84,533              |
| Total bases             | 669 Mb         | 729 Mb <sup>a</sup> |
| Maximum length          | 203,919        | 7,293,446           |
| N50 length <sup>b</sup> | 21,642         | 1,102,127           |
| N50 number              | 8843           | 155                 |

<sup>a</sup> Base size estimate includes gaps

<sup>b</sup>N50 statistic represents 50% of the genome assembly that is the defined length or longer.

**Supplementary Table 2: Diversity of transposable elements in fish**

| Species                           | Pufferfish<br>( <i>T. rubripes</i> ) | Pufferfish<br>( <i>T. nigroviridis</i> ) | Zebrafish<br>( <i>D. rerio</i> ) | Platyfish<br>( <i>X. maculatus</i> ) |
|-----------------------------------|--------------------------------------|------------------------------------------|----------------------------------|--------------------------------------|
| <b>Retrotransposons (Class I)</b> |                                      |                                          |                                  |                                      |
| <b>LINE</b>                       |                                      |                                          |                                  |                                      |
| Restriction enzyme-like           |                                      |                                          |                                  |                                      |
| NeSL/Zebulon                      | X                                    | X                                        | X                                | -                                    |
| R2                                | -                                    | -                                        | X                                | X                                    |
| R4/Rex6                           | X                                    | X                                        | -                                | X                                    |
| Apurinic/apyrimidic               |                                      |                                          |                                  |                                      |
| LINE1/TX1                         | X                                    | X                                        | X                                | X                                    |
| RTE/Rex3                          | X                                    | X                                        | X                                | X                                    |
| I/Bgr                             | F                                    | X                                        | X                                | -                                    |
| LINE2/Maui                        | X                                    | X                                        | X                                | X                                    |
| LINE3/CR1                         | X                                    | X                                        | X                                | X                                    |
| Rex1/Babar                        | X                                    | X                                        | X                                | X                                    |
| Nimb                              | ND                                   | ND                                       | X                                | ND                                   |
| Hero                              | ND                                   | ND                                       | X                                | X                                    |
| <b>SINE</b>                       | <b>X</b>                             | <b>ND</b>                                | <b>X</b>                         | <b>X</b>                             |
| <b>LTR</b>                        |                                      |                                          |                                  |                                      |
| Ty3/Gypsy                         |                                      |                                          |                                  |                                      |
| SURL                              | X                                    | X                                        | X                                | -                                    |
| SURL-like                         | X                                    | X                                        | X                                | -                                    |
| Jule                              | X                                    | X                                        | X                                | X                                    |
| CsRn1                             | X                                    | X                                        | X                                | -                                    |
| Sushi                             | X                                    | X                                        | X                                | X                                    |
| Barthez                           | X                                    | X                                        | X                                | X                                    |
| Gmr1                              | X                                    | X                                        | X                                | -                                    |
| Rex8                              | X                                    | X                                        | X                                | X                                    |
| Oswaldo                           | ND                                   | ND                                       | X                                | -                                    |
| Ty1/Copia                         | X                                    | X                                        | X                                | -                                    |
| BEL                               | X                                    | X                                        | X                                | X                                    |
| Retroviruses                      | X                                    | X                                        | X                                | X                                    |
| <b>DIRS1</b>                      | <b>X</b>                             | <b>X</b>                                 | <b>X</b>                         | <b>X</b>                             |
| <b>Penelope</b>                   | <b>X</b>                             | <b>X</b>                                 | <b>X</b>                         | <b>X</b>                             |
| <b>DNA Transposons (Class II)</b> |                                      |                                          |                                  |                                      |
| <b>Subclass I</b>                 |                                      |                                          |                                  |                                      |
| <b>TIR</b>                        |                                      |                                          |                                  |                                      |
| Tc1-Mariner                       | X                                    | X                                        | X                                | X                                    |
| hAT                               | X                                    | X                                        | X                                | X                                    |
| Harbinger                         | X                                    | ND                                       | X                                | X                                    |
| EnSpm                             | X                                    | X                                        | X                                | -                                    |
| P                                 | X                                    | X                                        | X                                | -                                    |
| PiggyBac                          | X                                    | -                                        | X                                | X                                    |
| MuDR                              | -                                    | X                                        | X                                | X                                    |
| ISL2EU                            | ND                                   | ND                                       | X                                | -                                    |
| MITE                              | ND                                   | ND                                       | X                                | X                                    |
| <b>Crypton</b>                    | -                                    | -                                        | -                                | -                                    |
| <b>Subclass II</b>                |                                      |                                          |                                  |                                      |
| <b>Helitron</b>                   | -                                    | -                                        | <b>X</b>                         | <b>X</b>                             |
| <b>Mavericks/Polintons</b>        | <b>ND</b>                            | <b>ND</b>                                | <b>X</b>                         | <b>X</b>                             |

The presence (X) or absence (-) of transposable element families is indicated for four fish species, two pufferfishes (*Takifugu rubripes* and *Tetraodon nigroviridis*) (data based on <sup>29</sup>), the zebrafish (*Danio rerio*) (data based on <sup>29</sup>) and the platyfish (*Xiphophorus maculatus*). Presence of transposable elements indicates that at least a trace or a fossil of the element has been detected. For some families, no data (ND) could be found. The two classes, retrotransposons and DNA transposons, are written in red, orders in green, superfamilies in blue and families in black.

**Supplementary Table 3: Comparison of the genome size and the percentage of transposable elements (TEs) in different vertebrate species**

| <b>Species</b>                                    | <b>Genome size (Mb)</b> | <b>Percentage of TEs (%)</b> | <b>References</b> |
|---------------------------------------------------|-------------------------|------------------------------|-------------------|
| <i>Takifugu rubripes</i><br>Torafugu              | 400                     | 2.7                          | 16                |
| <b><i>Xiphophorus maculatus</i><br/>Platyfish</b> | <b>900</b>              | <b>5</b>                     |                   |
| <i>Oreochromis niloticus</i><br>Nile tilapia      | 1200                    | 14                           | 30                |
| <i>Gallus gallus</i><br>Chicken                   | 1220                    | 4.3                          | 15,31             |
| <i>Danio rerio</i><br>Zebrafish                   | 1700                    | 15-20                        | 32                |
| <i>Mus musculus</i><br>Mouse                      | 2900                    | 38.2                         | 33                |
| <i>Salmo salar</i><br>Atlantic salmon             | 3000                    | 30-35                        | 34                |
| <i>Xenopus laevis</i><br>Clawed frog              | 3100                    | 37                           | 35                |
| <i>Homo sapiens</i><br>Human                      | 3400                    | 44.8                         | 36                |



**Supplementary Table 4: Location of pigmentation genes on X chromosome.**

Pigmentation genes located on the X chromosome (LG21) were identified during the course of the post-teleost genome duplication paralog retention analysis and the position of the respective scaffold in the genetic map-based genome assembly was determined.

| gene       | platyfish gene ID* | Linkage group | start    | end      | orientation | transcript ID* | scaffold   | map position       |
|------------|--------------------|---------------|----------|----------|-------------|----------------|------------|--------------------|
| asip2a     | -                  | group21       | 4772651  | 4772764  | -1          | -              | JH556882.1 | LG21: 5.8-8.1 cM   |
| egfrb/xmrk | G0266747           | group21       | 21380952 | 21381682 | 1           | T0024005       | JH558217.1 | LG21: 71.2 cM      |
| myca       | G0327718           | group21       | 15128501 | 15132049 | -1          | T0029430       | JHP00189.0 | LG21: 35.8-42.7 cM |
| rps20      | -                  | group21       | 4925435  | 4925789  | 1           | -              | JH557038.1 | LG21: 8.1-8.9 cM   |
| tfap2a     | G0209431           | group21       | 7585659  | 7586219  | 1           | T0018927       | JH557150.1 | LG21: 15.1 cM      |
| muted      | -                  | group21       | 6925178  | 6925554  | -1          | -              | JHP00191.0 | LG21: 10.8-14.3 cM |

\*Genes without gene/transcript ID not represented in the transcriptome and were identified by tblastn searches against the genome assembly using medaka/stickleback proteins as query sequences.

**Supplementary Table 5: Viviparity related genes tested for positive selection<sup>a</sup>**

| Gene       | category       | Species used <sup>a</sup>             | alignment length(starting position <sup>b</sup> ) | dN/dS | 2(lnl N- lnIA) | p-value | PS <sup>c</sup> | Liver FPKM | Ovary FPKM | GOs                                                                                                                                                                                                                                                                                                                                                               | Reference |
|------------|----------------|---------------------------------------|---------------------------------------------------|-------|----------------|---------|-----------------|------------|------------|-------------------------------------------------------------------------------------------------------------------------------------------------------------------------------------------------------------------------------------------------------------------------------------------------------------------------------------------------------------------|-----------|
| alveolin   | Zona Pellucida | no significant <i>Xiphophorus</i> hit |                                                   |       |                |         |                 |            |            |                                                                                                                                                                                                                                                                                                                                                                   | 37        |
| cathepsind | Yolk           | ZF, M, SB, TD, XM, XH                 | 957(247)                                          | 0.065 | 1.42           | 0.23    | N               | 71.147     | 1.276      | C:lysosome; P:response to bacterium; P:proteolysis; F:aspartic-type endopeptidase activity                                                                                                                                                                                                                                                                        | 38        |
| cdx1a      | placenta       | ZF, M, SB,TD,XH                       | 999(1)                                            | 0.107 | 0              | 1       | N               | 0          | 0          | P:facial nucleus development; P:facial nerve structural organization; F:transcription regulator activity; F:transcription factor activity; P:positive regulation of transcription from RNA polymerase II promoter; P:rhomomere 3 development; P:anatomical structure formation involved in morphogenesis; C:nucleus                                               | 39        |
| cdx4       | placenta       | ZF, M, SB,XH                          | 732(85)                                           | 0.06  | 0.2            | 0.65    | N               | 0.02       | 0.128      | P:anterior/posterior axis specification; P:embryonic foregut morphogenesis; P:retinoic acid receptor signaling pathway; F:transcription regulator activity; P:pancreas development; F:sequence-specific DNA binding; P:epithelial cell differentiation; F:transcription factor activity; P:epithelial cell proliferation; P:positive regulation of transcription, | 39        |

| Gene               | category       | Species used <sup>a</sup> | alignment length(starting position <sup>b</sup> ) | dN/dS | 2(lnl N- lnIA) | p-value  | PS <sup>c</sup> | Liver FPKM | Ovary FPKM | GOs                                                                                                                                                                                                                                                                                                               | Reference |
|--------------------|----------------|---------------------------|---------------------------------------------------|-------|----------------|----------|-----------------|------------|------------|-------------------------------------------------------------------------------------------------------------------------------------------------------------------------------------------------------------------------------------------------------------------------------------------------------------------|-----------|
| choriogeninH       | Zona Pellucida | ZF, M, XH                 | 1212(22)                                          | 0.09  | 1.3            | 0.24     | N               | 174.578    | 0.725      | -                                                                                                                                                                                                                                                                                                                 | 40        |
| choriogeninH-minor | Zona Pellucida | ZF, M, SB, TD, XM, XH     | 600(268)                                          | 0.19  | 13.56          | 2.30E-04 | Y               | 52.835     | 0.152      | -                                                                                                                                                                                                                                                                                                                 | 40        |
| choriogeninL       | Zona Pellucida | ZF, M, SB, TD, XM, XH     | 1263(253)                                         | 0.246 | 0              | 1        | N               | 176.218    | 0          | -                                                                                                                                                                                                                                                                                                                 | 40        |
| choriolysinH       | Zona Pellucida | ZF, M, SB, TD, XM, XH     | 804(1)                                            | 0.17  | 25.86          | 3.67E-07 | Y               | 254.26     | 0.027      | F:metalloendopeptidase activity; P:proteolysis; F:zinc ion binding                                                                                                                                                                                                                                                | 40        |
| choriolysinL       | Zona Pellucida | ZF, M, SB, TD, XM         | 840(1)                                            | 0.05  | 11.68          | 6.00E-04 | Y               | 8.561      | 8.84       | F:metalloendopeptidase activity; P:proteolysis; F:zinc ion binding                                                                                                                                                                                                                                                | 40        |
| ets2               | placenta       | ZF, M, SB, TD, XM         | 555(760)                                          | 0.123 | 0              | 1        | N               | 0.816      | 6.672      | P:skeletal system development; P:angiogenesis; P:heart morphogenesis; P:response to antibiotic; P:hemangioblast cell differentiation; P:positive regulation of cellular component movement; P:immune response; P:negative regulation of cell cycle; P:negative regulation of cell proliferation; P:cell motility; | 41        |
| gcm1               | placenta       | ZF, M, SB, TD, XM, XH     | 288(1207)                                         | 0.058 | 0.74           | 0.39     | N               | 0          | 0.157      | P:regulation of transcription, DNA-dependent; P:cartilage development; P:organ morphogenesis; P:epidermal cell fate specification; F:DNA binding; C:nucleus                                                                                                                                                       | 42        |

| Gene | category | Species used <sup>a</sup> | alignment length(starting position <sup>b</sup> ) | dN/dS | 2(lnl N- lnlA) | p-value | PS <sup>c</sup> | Liver FPKM | Ovary FPKM | GOs                                                                                                                                                                                                                                                                                                                                                                                                                                                                                    | Reference |
|------|----------|---------------------------|---------------------------------------------------|-------|----------------|---------|-----------------|------------|------------|----------------------------------------------------------------------------------------------------------------------------------------------------------------------------------------------------------------------------------------------------------------------------------------------------------------------------------------------------------------------------------------------------------------------------------------------------------------------------------------|-----------|
| hb58 | placenta | M, SB,TD, XM,XH           | 1530(46)                                          | 0.142 | 1.58           | 0.21    | N               | 6.354      | 35.373     | F:protein kinase C binding; F:RNA binding; P:protein heterooligomerization; P:N-glycan processing; P:intracellular protein kinase cascade; F:calcium ion binding; P:protein amino acid N-linked glycosylation via asparagine; P:protein folding; P:innate immune response; C:alpha-glucosidase II complex; P:post-translational protein modification; C:endoplasmic reticulum lumen; P:phosphorylation; F:kinase activity; P:pronephros development; C:plasma membrane                 | 43        |
| hgfb | placenta | ZF, M, SB, TD, XM         | 582(1390)                                         | 0.096 | 0              | 1       | N               | 0          | 7.754      | P:hepatocyte growth factor receptor signaling pathway; P:neuron migration; P:myoblast proliferation; F:growth factor activity; P:regulation of branching involved in salivary gland morphogenesis by mesenchymal-epithelial signaling; P:organ regeneration; P:cell morphogenesis; C:extracellular space; F:protein heterodimerization activity; P:anti-apoptosis; P:liver development; F:catalytic activity; P:cerebellar granule cell differentiation; P:activation of MAPK activity | 41        |

| Gene  | category | Species used <sup>a</sup> | alignment length(starting position <sup>b</sup> ) | dN/dS | 2(lnl N- lnlA) | p-value | PS <sup>c</sup> | Liver FPKM | Ovary FPKM | GOs                                                                                                                                                                                                                                                                                                                                                                                                                                                                                                                           | Reference |
|-------|----------|---------------------------|---------------------------------------------------|-------|----------------|---------|-----------------|------------|------------|-------------------------------------------------------------------------------------------------------------------------------------------------------------------------------------------------------------------------------------------------------------------------------------------------------------------------------------------------------------------------------------------------------------------------------------------------------------------------------------------------------------------------------|-----------|
| hxt   | placenta | ZF, M, SB, TD, XM, XH     | 624(1)                                            | 0.048 | 1.9            | 0.17    | N               | 5.918      | 0.179      | P:trophectodermal cell differentiation; P:angiogenesis; P:negative regulation of transcription from RNA polymerase II promoter; P:cardiac septum morphogenesis; P:ventricular cardiac muscle tissue morphogenesis; C:cytoplasm; P:heart looping; F:transcription coactivator activity; P:cardiac left ventricle formation; ; P:cardiac right ventricle formation; P:positive regulation of transcription from RNA polymerase II promoter; F:protein homodimerization activity; C:nucleus; F:bHLH transcription factor binding | 44        |
| igf2  | placenta | ZF, TD, XM, PC            | 663(1)                                            | 0.16  | 3.89           | 0.05    | Y               | 19.582     | 27.984     | F:growth factor activity; C:extracellular space; F:hormone activity                                                                                                                                                                                                                                                                                                                                                                                                                                                           |           |
| mash2 | placenta | ZF, M, SB, TD, XM, XH     | 423(118)                                          | 0.046 | 0              | 1       | N               | 0.044      | 0.107      | -                                                                                                                                                                                                                                                                                                                                                                                                                                                                                                                             | 45        |
| ncoa6 | placenta | ZF, M, SB, TD, XM, XH     | 4659(133)                                         | 0.148 | 80.76          | 0       | Y               | 2.872      | 1.842      | P:transcription initiation from RNA polymerase II promoter; P:brain development; C:transcription factor complex; P:heart development; P:labyrinthine layer blood vessel development; F:receptor binding; F:transcription coactivator activity; P:positive regulation of transcription, DNA-dependent; F:chromatin binding                                                                                                                                                                                                     | 46        |

| Gene   | category | Species used <sup>a</sup> | alignment length(starting position <sup>b</sup> ) | dN/dS | 2(lnl N- lnIA) | p-value | PS <sup>c</sup> | Liver FPKM | Ovary FPKM | GOs                                                                                                                                                                                                                                                                                             | Reference |
|--------|----------|---------------------------|---------------------------------------------------|-------|----------------|---------|-----------------|------------|------------|-------------------------------------------------------------------------------------------------------------------------------------------------------------------------------------------------------------------------------------------------------------------------------------------------|-----------|
| ppara1 | placenta | ZF, M, SB, TD, XM, XH     | 930(460)                                          | 0.033 | 1.22           | 0.27    | N               | 3.409      | 22.469     | P:steroid hormone mediated signaling pathway; F:zinc ion binding; P:positive regulation of transcription from RNA polymerase II promoter; P:response to cold; F:lipid binding; F:sequence-specific DNA binding; F:transcription factor activity; F:steroid hormone receptor activity; C:nucleus | 47        |
| ppara2 | placenta | ZF, M, SB, TD, XM, XH     | 1470(1)                                           | 0.083 | 0              | 1       | N               | 45.163     | 71.416     | P:steroid hormone mediated signaling pathway; F:zinc ion binding; P:regulation of transcription, DNA-dependent; P:response to cold; F:sequence-specific DNA binding; F:transcription factor activity; F:steroid hormone receptor activity; C:nucleus                                            | 47        |
| pparab | placenta | ZF, M, SB, TD, XM, XH     | 1575(1)                                           | 0.083 | 0.66           | 0.42    | N               | 17.268     | 16.551     | P:steroid hormone mediated signaling pathway; F:zinc ion binding; P:regulation of transcription, DNA-dependent; F:sequence-specific DNA binding; F:transcription factor activity; F:steroid hormone receptor activity; C:nucleus                                                                | 47        |
| pparg  | placenta | M, SB, TD, XH             | 1626(1)                                           | 0.122 | 5.92           | 0.015   | Y               | 29.214     | 21.2       | P:steroid hormone mediated signaling pathway; F:zinc ion binding; P:regulation of transcription, DNA-dependent; F:sequence-specific DNA binding; F:transcription factor activity; F:steroid hormone receptor activity; C:nucleus                                                                | 47        |

| Gene             | category       | Species used <sup>a</sup> | alignment length(starting position <sup>b</sup> ) | dN/dS   | 2(lnI N- lnIA) | p-value  | PS <sup>c</sup> | Liver FPKM | Ovary FPKM | GOs                                                                                                                                                                                                                                                                             | Reference |
|------------------|----------------|---------------------------|---------------------------------------------------|---------|----------------|----------|-----------------|------------|------------|---------------------------------------------------------------------------------------------------------------------------------------------------------------------------------------------------------------------------------------------------------------------------------|-----------|
| transglutaminase | Yolk           | ZF, M, SB, TD, XH         | 2082(1)                                           | 0.138   | 0              | 1        | N               | 15.599     | 28.840     | P: blood coagulation; P: peptide cross-linking; F: protein-glutamine gamma-glutamyltransferase activity                                                                                                                                                                         | 48        |
| vtg_receptor     | Yolk           | ZF, M, SB, TD, XM, XH     | 2460(52)                                          | 0.0453  | 0.015          | 0.71     | N               | 0          | 5.149      | P: ventral spinal cord development; C: coated pit; F: apolipoprotein binding; P: lipid transport; F: calcium ion binding; F: lipoprotein receptor activity; P: cholesterol metabolic process; C: integral to membrane; P: endocytosis; C: very-low-density lipoprotein particle | 49        |
| vtg1             | Yolk           | ZF, M, SB, XM             | 3276(1)                                           | 0.323   | 16.48          | 4.92E-05 | Y               | 12438.587  | 0.189      | F: lipid transporter activity; F: nutrient reservoir activity; P: lipid transport                                                                                                                                                                                               | 50        |
| vtg2             | Yolk           | ZF, M, TD, XM             | 5097(16)                                          | 0.248   | 0.98           | 0.32     | N               | 9943.06    | 1.578      | F: lipid transporter activity; F: nutrient reservoir activity; P: lipid transport                                                                                                                                                                                               | 50        |
| vtg3             | Yolk           | M, SB, TD, XM             | 1329(2488)                                        | 0.325   | 0.012          | 0.73     | N               | 14835.1    | 0          | F: lipid transporter activity; P: response to chemical stimulus; P: lipid transport                                                                                                                                                                                             |           |
| zpax             | Zona Pellucida | ZF, M, SB, TD, XM         | 2589(130)                                         | 0.188   | 0              | 1        | N               | 0.034      | 124.674    | F: molecular_function; P: biological_process; C: cellular_component                                                                                                                                                                                                             | 51        |
| zpb              | Zona Pellucida | ZF, M, SB, TD, XM, XH     | 873(214)                                          | 0.196   | 1.38           | 0.24     | N               | 0          | 143.46     | -                                                                                                                                                                                                                                                                               | 51        |
| zpc1             | Zona Pellucida | M, SB, TD, XM, XH         | 810(52)                                           | 0.19934 | 1.86           | 0.17     | N               | 0          | 68.403     | -                                                                                                                                                                                                                                                                               | 51        |

| Gene | category       | Species used <sup>a</sup> | alignment length(starting position <sup>b</sup> ) | dN/dS | 2(lnl N- lnlA) | p-value  | PS <sup>c</sup> | Liver FPKM | Ovary FPKM | GOs                                                                                                                                      | Reference |
|------|----------------|---------------------------|---------------------------------------------------|-------|----------------|----------|-----------------|------------|------------|------------------------------------------------------------------------------------------------------------------------------------------|-----------|
| zpc2 | Zona Pellucida | ZF, M, SB, TD, XM, XH     | 810(67)                                           | 0.128 | 0              | 1        | N               | 0          | 107.665    | -                                                                                                                                        | 51        |
| zpc3 | Zona Pellucida | ZF, M, SB, TD, XM         | 1454(212)                                         | 0.248 | 0.60           | 0.46     | N               | 0.1205     | 0.436      | -                                                                                                                                        | 51        |
| zpc4 | Zona Pellucida | ZF, M, SB, TD, XM         | 1673(24)                                          | 0.086 | 0.59           | 0.49     | N               | 8.596      | 15.955     | -                                                                                                                                        | 51        |
| zpc5 | Zona Pellucida | M, TD, XM, XH             | 1110(224)                                         | 0.157 | 0              | 1        | N               | 0          | 241.019    | F:molecular_function; P:biological_process; C:cellular_component                                                                         | 51        |
| zvep | Zona Pellucida | ZF, M, SB, TD, XM, XH     | 2433(94)                                          | 0.06  | 15             | 1.08E-04 | Y               | 2.735      | 7.17       | P:positive regulation of transcription, DNA-dependent; F:sequence-specific DNA binding; F:protein binding; C:nucleus; F:zinc ion binding | 52        |



| Gene      | category | Species used <sup>a</sup> | alignment length(starting position <sup>b</sup> ) | dN/dS | 2(lnl N- lnlA) | p-value | PS <sup>c</sup> | Liver FPKM | Ovary FPKM | GOs                                                                                                                                                                                                                                                                                                                                                                                                                                                                                                                                                                                                                                                              | Reference |
|-----------|----------|---------------------------|---------------------------------------------------|-------|----------------|---------|-----------------|------------|------------|------------------------------------------------------------------------------------------------------------------------------------------------------------------------------------------------------------------------------------------------------------------------------------------------------------------------------------------------------------------------------------------------------------------------------------------------------------------------------------------------------------------------------------------------------------------------------------------------------------------------------------------------------------------|-----------|
| actin2    | control  | M, SB, TD, XM, XH         | 879(19)                                           | 0.012 | 1.48           | 0.22    | N               | 9.198      | 4.914      | F:ATP binding; C:cytoplasm; C:cytoskeleton; F:nucleotide binding; P:embryonic heart tube development; P:skeletal muscle fiber development; P:heart contraction; P:actomyosin structure organization; P:ATP catabolic process; C:sarcomere; P:actin filament-based movement; C:striated muscle thin filament; P:apoptotic process; F:myosin binding; P:skeletal muscle thin filament assembly; C:actomyosin, actin part; F:ATPase activity; C:stress fiber; C:I band; P:cardiac muscle tissue morphogenesis; F:protein binding; P:cardiac myofibril assembly; C:actin filament; P:cardiac muscle contraction; C:soluble fraction; P:actin-myosin filament sliding |           |
| CAMK1     | control  | ZF, M, SB, TD, XM, XH     | 489(432)                                          | 0.021 | 0              | 1       | N               | 1.399      | 16.656     | F:kinase activity; F:ATP binding; F:protein kinase activity; P:phosphorylation; F:nucleotide binding; P:protein phosphorylation; F:protein serine/threonine kinase activity; C:calcium- and calmodulin-dependent protein kinase complex; F:transferase activity, transferring phosphorus-containing groups                                                                                                                                                                                                                                                                                                                                                       |           |
| Chaperone | control  | ZF, M, SB, TD, XM         | 303(30)                                           | 0.096 | 0              | 1       | N               | 3.452      | 2.473      | F:molecular_function; C:integral to membrane; C:membrane; P:biological_process                                                                                                                                                                                                                                                                                                                                                                                                                                                                                                                                                                                   |           |

| Gene         | category | Species used <sup>a</sup> | alignment length(starting position <sup>b</sup> ) | dN/dS | 2(lnl N- lnlA) | p-value | PS <sup>c</sup> | Liver FPKM | Ovary FPKM | GOs                                                                                                                                                                                                                                                                                                                               | Reference |
|--------------|----------|---------------------------|---------------------------------------------------|-------|----------------|---------|-----------------|------------|------------|-----------------------------------------------------------------------------------------------------------------------------------------------------------------------------------------------------------------------------------------------------------------------------------------------------------------------------------|-----------|
| cyclophilinB | control  | ZF, M, SB, TD, XM, XH     | 522(136)                                          | 0.062 | 0.917          | 0.34    | N               | 192.131    | 95.957     | F:peptidyl-prolyl cis-trans isomerase activity; P:protein folding; P:protein peptidyl-prolyl isomerization; F:isomerase activity; C:cellular_component; C:endoplasmic reticulum lumen; C:endoplasmic reticulum; C:melanosome; F:peptide binding                                                                                   |           |
| Esterase     | control  | ZF, M, XM, XH             | 807(1)                                            | 0.069 | 0              | 1       | N               | 0          | 0          | C:mitochondrion                                                                                                                                                                                                                                                                                                                   |           |
| GSTCD        | control  | M, SB, TD, XM, XH         | 786(1105)                                         | 0.092 | 0              | 1       | N               | 3.534      | 3.45       | P:rRNA processing; C:cytoplasm; F:transferase activity; P:rRNA methylation; F:rRNA methyltransferase activity; P:biological_process; F:protein binding; C:cellular_component; F:methyltransferase activity                                                                                                                        |           |
| tubulin      | control  | ZF, M, SB, TD, XM, XH     | 1065(247)                                         | 0.019 | 0              | 0.996   | N               | 1.994      | 2.152      | P:microtubule-based movement; P:microtubule-based process; P:protein polymerization; P:GTP catabolic process; C:microtubule; F:nucleotide binding; C:cytoplasm; F:GTP binding; C:protein complex; F:GTPase activity; F:structural molecule activity; C:cytoskeleton; P:spindle assembly; F:structural constituent of cytoskeleton |           |

| Gene         | category | Species used <sup>a</sup> | alignment length(starting position <sup>b</sup> ) | dN/dS | 2(lnl N- lnlA) | p-value | PS <sup>c</sup> | Liver FPKM | Ovary FPKM | GOs                                                                                                                                                                                                                                                                                                                                                                                                                                                 | Reference |
|--------------|----------|---------------------------|---------------------------------------------------|-------|----------------|---------|-----------------|------------|------------|-----------------------------------------------------------------------------------------------------------------------------------------------------------------------------------------------------------------------------------------------------------------------------------------------------------------------------------------------------------------------------------------------------------------------------------------------------|-----------|
| angioprotein | control  | ZF, M, SB, XM, XH         | 666(615)                                          | 0.07  | 2.76           | 0.097   | N               | 1.312      | 0          | P:transmembrane receptor protein tyrosine kinase signaling pathway; F:receptor binding; C:extracellular space; P:blood vessel development; P:signal transduction; P:Tie receptor signaling pathway; P:positive regulation of peptidyl-tyrosine phosphorylation; P:regulation of satellite cell proliferation; endothelial cell migration; C:membrane raft; P:multicellular organismal development; P:positive regulation of protein ubiquitination; |           |
| collagenIX   | control  | ZF, M, SB, TD,XH          | 867(1122)                                         | 0.073 | 2.43           | 0.119   | N               | 0.095      | 0.777      | C:collagen; F:molecular_function; C:collagen type IX; P:biological_process; C:cellular_component; C:extracellular region; P:axon guidance; P:skeletal system development; F:extracellular matrix structural constituent conferring tensile strength                                                                                                                                                                                                 |           |

| Gene     | category | Species used <sup>a</sup> | alignment length(starting position <sup>b</sup> ) | dN/dS | 2(lnl N- lnlA) | p-value | PS <sup>c</sup> | Liver FPKM | Ovary FPKM | GOs                                                                                                                                                                                                                                                                                                                                                                                                                                                                                                                                                                                                                                                                                                                                | Reference |
|----------|----------|---------------------------|---------------------------------------------------|-------|----------------|---------|-----------------|------------|------------|------------------------------------------------------------------------------------------------------------------------------------------------------------------------------------------------------------------------------------------------------------------------------------------------------------------------------------------------------------------------------------------------------------------------------------------------------------------------------------------------------------------------------------------------------------------------------------------------------------------------------------------------------------------------------------------------------------------------------------|-----------|
| Hsp90aa1 | control  | ZF, M, SB, TD, XH         | 1407(772)                                         | 0.027 | 1.4            | 0.236   | N               | 0.462      | 1.944      | C:melanosome; P:response to stress; F:protein homodimerization activity; F:nucleotide binding; C:cytoplasm; F:nitric-oxide synthase regulator activity; F:ATP binding; P:protein import into mitochondrial outer membrane; P:positive regulation of nitric oxide biosynthetic process; C:intracellular; ; P:protein folding; F:TPR domain binding; F:unfolded protein binding; C:perinuclear region of cytoplasm; P:cell cycle; P:gonad development; P:defense response; P:dauer larval development; F:identical protein binding; P:reproduction; P:nematode larval development; P:embryo development ending in birth or egg hatching; P:determination of adult lifespan; F:protein binding; P:hermaphrodite genitalia development |           |
| UHMK1    | control  | ZF, M, SB, TD, XM, XH     | 648(421)                                          | 0.07  | 0              | 1       | N               | 8.794      | 4.174      | F:nucleic acid binding; F:ATP binding; F:protein kinase activity; F:nucleotide binding; P:protein phosphorylation; F:transferase activity, transferring phosphorus-containing groups; C:cellular_component; F:RNA binding; C:nucleus; C:neuronal ribonucleoprotein granule; F:kinase activity; F:protein serine/threonine kinase activity; P:peptidyl-serine phosphorylation; P:regulation of protein export from nucleus; P:positive regulation of translational initiation; C:dendrite cytoplasm;                                                                                                                                                                                                                                |           |

| Gene  | category | Species used <sup>a</sup> | alignment length(starting position <sup>b</sup> ) | dN/dS | 2(lnl N-InlA) | p-value | PS <sup>c</sup> | Liver FPKM | Ovary FPKM | GOs                                                                                                                                                                                                                                                                                                                                                    | Reference |
|-------|----------|---------------------------|---------------------------------------------------|-------|---------------|---------|-----------------|------------|------------|--------------------------------------------------------------------------------------------------------------------------------------------------------------------------------------------------------------------------------------------------------------------------------------------------------------------------------------------------------|-----------|
| PLCE1 | control  | ZF, M, SB, TD, XH         | 2358(120)                                         | 0.047 | 0.49          | 0.484   | N               | 0.198      | 6.115      | P:intracellular signal transduction; F:phosphatidylinositol phospholipase C activity; P:lipid metabolic process; F:guanyl-nucleotide exchange factor activity; F:phosphoric diester hydrolase activity; P:signal transduction; F:phospholipase C activity; C:intracellular; F:signal transducer activity; P:small GTPase mediated signal transduction; |           |
| PNN   | control  | ZF, M, SB, TD, XM, XH     | 552(1)                                            | 0.063 | 0             | 1       | N               | 15.698     | 32.626     | C:catalytic step 2 spliceosome; P:cell-cell adhesion; P:mRNA processing; C:desmosome; C:nucleus; F:DNA binding; P:RNA splicing; C:cell junction; C:cytoplasm; P:regulation of transcription, DNA-dependent; C:spliceosomal complex; P:transcription, DNA-dependent; C:nuclear speck                                                                    |           |
| PK2   | control  | ZF, M, SB, TD, XM, XH     | 1164(1)                                           | 0.045 | 0.75          | 0.386   | N               | 3.631      | 8.006      | P:transforming growth factor beta receptor signaling pathway; P:positive regulation of cell proliferation; P:regulation of transcription, DNA-dependent; C:PML body; P:adult walking behavior; C:nuclear body;;                                                                                                                                        |           |
| NDP   | control  | ZF, M, SB, TD, XM, XH     | 747(88)                                           | 0.053 | 0             | 1       | N               | 5.178      | 18.428     | C:cytoplasm; C:cytoskeleton; C:spindle; C:microtubule organizing center; P:transport; C:microtubule; P:retrograde axon cargo transport; P:regulation of neuron projection development; P:cell migration; C:chromosome; P:cell differentiation; P:nuclear envelope                                                                                      |           |

| Gene    | category | Species used <sup>a</sup> | alignment length(starting position <sup>b</sup> ) | dN/dS | 2(lnl N- lnlA) | p-value | PS <sup>c</sup> | Liver FPKM | Ovary FPKM | GOs                                                                                                                                                                                                                                                                                                                                                                                                                                                               | Reference |
|---------|----------|---------------------------|---------------------------------------------------|-------|----------------|---------|-----------------|------------|------------|-------------------------------------------------------------------------------------------------------------------------------------------------------------------------------------------------------------------------------------------------------------------------------------------------------------------------------------------------------------------------------------------------------------------------------------------------------------------|-----------|
| Ankyrin | control  | ZF, M, SB, TD, XM, XH     | 765(1108)                                         | 0.263 | 0              | 1       | N               | 0.918      | 1.821      | F:zinc ion binding; C:intracellular; F:metal ion binding                                                                                                                                                                                                                                                                                                                                                                                                          |           |
| GCS     | control  | ZF, M, SB, TD, XM, XH     | 1047(100)                                         | 0.023 | 0.213          | 0.644   | N               | 5.41       | 22.255     | F:ceramide glucosyltransferase activity; P:glycosphingolipid metabolic process; F:transferase activity; F:transferase activity, transferring glycosyl groups; C:integral to membrane; C:membrane; P:lipid metabolic process; P:lipid biosynthetic process; C:Golgi apparatus; P:sphingolipid metabolic process; P:glycosphingolipid biosynthetic process; C:Golgi membrane; P:glucosylceramide biosynthetic process; C:membrane fraction; P:epidermis development |           |
| Hsp27   | control  | ZF, M, XM                 | 606(1)                                            | 0.101 | 0              | 1       | N               | 12.708     | 8.207      | P:response to stress; P:response to heat; C:cytoplasm; P:response to arsenic-containing substance; C:nucleus; C:nucleolus                                                                                                                                                                                                                                                                                                                                         |           |

<sup>a</sup>Likelihood values were calculated by using PAML v4.4. A likelihood ratio test applied to a chi-square distribution with degree of freedom =1. A p-value <0.05 is considered as positively selected.

<sup>b</sup>ZF: zebrafish; M: medaka; SB: stickleback; TD: *Tetraodon*; XM: *X. maculatus*; XH: *X. hellerii*; PL: *P. lucida*

<sup>c</sup>PS: positive selection; N: no; Y: yes

**Supplementary Table 6: Test in mammals for selection of viviparity genes positively selected in livebearing fish<sup>a</sup>**

| <u>Gene</u>              | <u>Alignment Length [bp]</u> | <u>Species used</u>                              | <u>2(lnlN-lnlA)</u> | <u>p-value</u> | <u>PS<sup>b</sup></u> |
|--------------------------|------------------------------|--------------------------------------------------|---------------------|----------------|-----------------------|
| <i>igf2</i>              | 555                          | mouse, human, cow, wallaby <sup>c</sup>          | 1,4                 | 0,24           | N                     |
| <i>pparag</i>            | 1425                         | cow, human, mouse, opossum, wallaby <sup>c</sup> | 0                   | 1              | N                     |
| <i>ncoa6</i>             | 6255                         | cow, human, mouse, opossum <sup>c</sup>          | 0,15                | 0,7            | N                     |
| <i>vtg1</i>              | n.a.                         | missing in all species                           | -                   | -              | -                     |
| <i>choriogeninHminor</i> | 1749                         | human, mouse, opossum, wallaby                   | 31                  | 2,58E-08       | Y                     |
| <i>choriolsinH</i>       | 894                          | cow, human, mouse, wallaby                       | 1,8                 | 0,18           | N                     |
| <i>choriolsinL</i>       | NA                           | missing in marsupials                            | -                   | -              | -                     |
| <i>zvep</i>              | 2085                         | cow, human, mouse, opossum <sup>c</sup>          | 0                   | 1              | N                     |

<sup>a</sup>Likelihood values were calculated by using PAML v4.4. A likelihood ratio test applied to a chi-square distribution with degree of freedom =1. A p-value <0.05 is considered as positively selected.

<sup>b</sup>PS: positive selection; N: no; Y: yes

<sup>c</sup>inclusion of platypus led to shorter alignment lengths (partly due to the more fragmented genome assembly), but did not change the result.

**Supplementary Table 7: List of cognition, pigmentation and liver genes used for post-TGD retention rate analyses**

(TGD duplicated genes are in bold)

| Cognition   |                   |                 |                        | Pigmentation |                   |                 |                              | Liver       |                   |                |                        |
|-------------|-------------------|-----------------|------------------------|--------------|-------------------|-----------------|------------------------------|-------------|-------------------|----------------|------------------------|
| gene number | dupl. gene number | gene            | human Ensembl ID       | gene number  | dupl. gene number | gene            | human Ensembl ID             | gene number | dupl. gene number | gene           | human Ensembl ID       |
| 1           | 1                 | <b>ABCD3</b>    | <b>ENSG00000117528</b> | 1            |                   | abhd11          | ENSG00000106077              | 1           |                   | Aacs           | ENSG00000081760        |
| 2           | 2                 | <b>ALDOA</b>    | <b>ENSG00000149925</b> | 2            | 1                 | <b>adam17</b>   | <b>ENSG00000151694</b>       | 2           |                   | Abce1          | ENSG00000164163        |
| 3           | 3                 | <b>ANK3</b>     | <b>ENSG00000151150</b> | 3            |                   | adamts20        | ENSG00000173157              | 3           |                   | Abhd11         | ENSG00000106077        |
| 4           | 4                 | <b>APOE</b>     | <b>ENSG00000130203</b> | 4            |                   | ap3b1           | ENSG00000132842              | 4           |                   | Acadm          | ENSG00000117054        |
| 5           |                   | ARFGAP2         | ENSG00000149182        | 5            |                   | ap3d1           | ENSG00000065000              | 5           |                   | Acvr1          | ENSG00000115170        |
| 6           |                   | ARFGEF2         | ENSG00000124198        | 6            |                   | apc             | ENSG00000134982              | 6           |                   | Ada            | ENSG00000196839        |
| 7           |                   | ASTN2           | ENSG00000148219        | 7            |                   | asip            | ENSG00000101440              | 7           |                   | Apc            | ENSG00000134982        |
| 8           |                   | ATIC            | ENSG00000138363        | 8            | 2                 | <b>asip2</b>    | <b>not detected in human</b> | 8           | 1                 | <b>Arf6</b>    | <b>ENSG00000165527</b> |
| 9           |                   | ATP1A2          | ENSG00000018625        | 9            |                   | atoh7           | ENSG00000179774              | 9           |                   | Asl            | ENSG00000126522        |
| 10          | 5                 | <b>ATP1A3</b>   | <b>ENSG00000105409</b> | 10           |                   | atox1           | ENSG00000177556              | 10          |                   | Ass1           | ENSG00000130707        |
| 11          | 6                 | <b>ATP2A2</b>   | <b>ENSG00000174437</b> | 11           | 3                 | <b>atp6ap1</b>  | <b>ENSG00000071553</b>       | 11          |                   | Atg7           | ENSG00000197548        |
| 12          |                   | ATXN10          | ENSG00000130638        | 12           |                   | atp6ap2         | ENSG00000182220              | 12          |                   | Atp5o          | ENSG00000241837        |
| 13          | 7                 | <b>BAI1</b>     | <b>ENSG00000181790</b> | 13           | 4                 | <b>atp6v0c</b>  | <b>ENSG00000185883</b>       | 13          | 2                 | <b>Atp6ap1</b> | <b>ENSG00000071553</b> |
| 14          | 8                 | <b>BAIAP2</b>   | <b>ENSG00000175866</b> | 14           |                   | atp6v0d1        | ENSG00000159720              | 14          |                   | Atp6ap2        | ENSG00000182220        |
| 15          | 9                 | <b>CACNA2D1</b> | <b>ENSG00000153956</b> | 15           | 5                 | <b>atp6v1e1</b> | <b>ENSG00000131100</b>       | 15          | 3                 | <b>Atp6v0c</b> | <b>ENSG00000185883</b> |



| Cognition   |                   |                |                        | Pigmentation |                   |               |                        | Liver       |                   |              |                        |
|-------------|-------------------|----------------|------------------------|--------------|-------------------|---------------|------------------------|-------------|-------------------|--------------|------------------------|
| gene number | dupl. gene number | gene           | human Ensembl ID       | gene number  | dupl. gene number | gene          | human Ensembl ID       | gene number | dupl. gene number | gene         | human Ensembl ID       |
| 16          |                   | CACNA2D2       | ENSG00000007402        | 16           |                   | atp6v1f       | ENSG00000128524        | 16          |                   | Atp6v1f      | ENSG00000128524        |
| 17          |                   | CACNA1C        | ENSG00000151067        | 17           |                   | atp6v1h       | ENSG00000047249        | 17          |                   | Atp6v1h      | ENSG00000047249        |
| 18          |                   | CAMK2D1        | ENSG00000145349        | 18           |                   | atp7a         | ENSG00000165240        | <b>18</b>   | <b>4</b>          | <b>Bmp2</b>  | <b>ENSG00000125845</b> |
| <b>19</b>   | <b>10</b>         | <b>CAPN1</b>   | <b>ENSG00000014216</b> | 19           |                   | atp7b         | ENSG00000123191        | 19          |                   | Bysl         | ENSG00000112578        |
| 20          |                   | CC2D1A         | ENSG00000132024        | 20           |                   | atrn          | ENSG00000088812        | 20          |                   | C1orf109     | ENSG00000116922        |
| 21          |                   | CDH13          | ENSG00000140945        | 21           |                   | bloc1s3       | ENSG00000189114        | 21          |                   | C11orf2      | ENSG00000149823        |
| 22          |                   | CHD1L          | ENSG00000131778        | 22           |                   | cno           | ENSG00000186222        | 22          |                   | Cacna1c      | ENSG00000151067        |
| <b>23</b>   | <b>11</b>         | <b>CHL1</b>    | <b>ENSG00000134121</b> | <b>23</b>    | <b>6</b>          | <b>creb1</b>  | <b>ENSG00000118260</b> | 23          |                   | Cad          | ENSG00000084774        |
| <b>24</b>   | <b>12</b>         | <b>CHRNA7</b>  | <b>ENSG00000175344</b> | <b>24</b>    | <b>7</b>          | <b>csf1r</b>  | <b>ENSG00000182578</b> | 24          |                   | Cebpg        | ENSG00000153879        |
| <b>25</b>   | <b>13</b>         | <b>CIT</b>     | <b>ENSG00000122966</b> | 25           |                   | dac/fbxw4     | ENSG00000107829        | <b>25</b>   | <b>5</b>          | <b>Cadm1</b> | <b>ENSG00000182985</b> |
| <b>26</b>   | <b>14</b>         | <b>CNTN1</b>   | <b>ENSG00000018236</b> | 26           |                   | dct           | ENSG00000080166        | 26          |                   | Ccnd1        | ENSG00000110092        |
| 27          |                   | CNTN2          | ENSG00000184144        | 27           |                   | drd2          | ENSG00000149295        | 27          |                   | Ccne         | ENSG00000105173        |
| <b>28</b>   | <b>15</b>         | <b>CNTN4</b>   | <b>ENSG00000144619</b> | <b>28</b>    | <b>8</b>          | <b>dtnbp1</b> | <b>ENSG00000047579</b> | 28          |                   | Ccdc49       | ENSG00000108296        |
| 29          |                   | CNTNAP1        | ENSG00000108797        | 29           |                   | ebna1bp2      | ENSG00000117395        | 29          |                   | Ccm2         | ENSG00000136280        |
| <b>30</b>   | <b>16</b>         | <b>CNTNAP2</b> | <b>ENSG00000174469</b> | 30           |                   | ece1          | ENSG00000117298        | 30          |                   | Ccna2        | ENSG00000145386        |
| 31          |                   | COMT           | ENSG00000093010        | 31           |                   | eda           | ENSG00000158813        | 31          |                   | Cct5         | ENSG00000150753        |
| 32          |                   | COX6B1         | ENSG00000126267        | <b>32</b>    | <b>9</b>          | <b>edn3</b>   | <b>ENSG00000124205</b> | <b>32</b>   | <b>6</b>          | <b>Cdc37</b> | <b>ENSG00000105401</b> |
| 33          |                   | CSMD2          | ENSG00000121904        | <b>33</b>    | <b>10</b>         | <b>ednrb1</b> | <b>ENSG00000136160</b> | 33          |                   | Cdipt        | ENSG00000103502        |

| Cognition   |                   |               |                        | Pigmentation |                   |              |                        | Liver       |                   |               |                        |
|-------------|-------------------|---------------|------------------------|--------------|-------------------|--------------|------------------------|-------------|-------------------|---------------|------------------------|
| gene number | dupl. gene number | gene          | human Ensembl ID       | gene number  | dupl. gene number | gene         | human Ensembl ID       | gene number | dupl. gene number | gene          | human Ensembl ID       |
| 34          |                   | CST3          | ENSG00000101439        | 34           |                   | ednrb2       | not detected in human  | <b>34</b>   | <b>7</b>          | <b>Cdx1</b>   | <b>ENSG00000113722</b> |
| 35          |                   | CTNNA1        | ENSG00000044115        | <b>35</b>    | <b>11</b>         | <b>egfr</b>  | <b>ENSG00000146648</b> | 35          |                   | Cdx4          | ENSG00000131264        |
| 36          |                   | CTNNA2        | ENSG00000066032        | <b>36</b>    | <b>12</b>         | <b>en1</b>   | <b>ENSG00000163064</b> | 36          |                   | Cebpa         | ENSG00000245848        |
| <b>37</b>   | <b>17</b>         | <b>CTNNB1</b> | <b>ENSG00000168036</b> | <b>37</b>    | <b>13</b>         | <b>erbb3</b> | <b>ENSG00000065361</b> | <b>37</b>   | <b>8</b>          | <b>Chmp6</b>  | <b>ENSG00000176108</b> |
| <b>38</b>   | <b>18</b>         | <b>CTNND1</b> | <b>ENSG00000198561</b> | 38           |                   | fgfr2        | ENSG00000066468        | 38          |                   | Cited2        | ENSG00000164442        |
| <b>39</b>   | <b>19</b>         | <b>CTNND2</b> | <b>ENSG00000169862</b> | 39           |                   | fig4         | ENSG00000112367        | <b>39</b>   | <b>9</b>          | <b>Clint1</b> | <b>ENSG00000113282</b> |
| 40          |                   | DGKB          | ENSG00000136267        | 40           |                   | foxd3        | ENSG00000187140        | <b>40</b>   | <b>10</b>         | <b>Cltc</b>   | <b>ENSG00000141367</b> |
| 41          |                   | DIRAS2        | ENSG00000165023        | <b>41</b>    | <b>14</b>         | <b>frem2</b> | <b>ENSG00000150893</b> | 41          |                   | Cnot1         | ENSG00000125107        |
| 42          |                   | DISC1         | ENSG00000162946        | 42           |                   | fzd4         | ENSG00000174804        | 42          |                   | Cpsf1         | ENSG00000071894        |
| 43          |                   | DLAT          | ENSG00000150768        | 43           |                   | gart         | ENSG00000159131        | <b>43</b>   | <b>11</b>         | <b>Cpsf3</b>  | <b>ENSG00000119203</b> |
| 44          |                   | DLD           | ENSG00000091140        | 44           |                   | gch1         | ENSG00000131979        | 44          |                   | Cstf3         | ENSG00000176102        |
| <b>45</b>   | <b>20</b>         | <b>DLGAP2</b> | <b>ENSG00000198010</b> | 45           |                   | gch2         | not detected in human  | <b>45</b>   | <b>12</b>         | <b>Ctnnb1</b> | <b>ENSG00000168036</b> |
| <b>46</b>   | <b>21</b>         | <b>DNM1</b>   | <b>ENSG00000106976</b> | 46           |                   | gchfr        | ENSG00000137880        | 46          |                   | Ctdp1         | ENSG00000060069        |
| <b>47</b>   | <b>22</b>         | <b>DNM2</b>   | <b>ENSG00000079805</b> | 47           |                   | gfpt1        | ENSG00000198380        | 47          |                   | Ddx18         | ENSG00000088205        |
| <b>48</b>   | <b>23</b>         | <b>DNM3</b>   | <b>ENSG00000197959</b> | <b>48</b>    | <b>15</b>         | <b>ghr</b>   | <b>ENSG00000112964</b> | 48          |                   | Ddx27         | ENSG00000124228        |
| 49          |                   | DOCK2         | ENSG00000134516        | <b>49</b>    | <b>16</b>         | <b>gja5</b>  | <b>ENSG00000143140</b> | 49          |                   | Def           | ENSG00000117597        |
| 50          |                   | DPP10         | ENSG00000175497        | <b>50</b>    | <b>17</b>         | <b>gnaq</b>  | <b>ENSG00000156052</b> | 50          |                   | Tsr2          | ENSG00000158526        |
| <b>51</b>   | <b>24</b>         | <b>DPP6</b>   | <b>ENSG00000130226</b> | <b>51</b>    | <b>18</b>         | <b>gna11</b> | <b>ENSG00000088256</b> | 51          |                   | Eif3d         | ENSG00000100353        |

| Cognition   |                   |        |                  | Pigmentation |                   |        |                  | Liver       |                   |         |                  |
|-------------|-------------------|--------|------------------|--------------|-------------------|--------|------------------|-------------|-------------------|---------|------------------|
| gene number | dupl. gene number | gene   | human Ensembl ID | gene number  | dupl. gene number | gene   | human Ensembl ID | gene number | dupl. gene number | gene    | human Ensembl ID |
| 52          | 25                | DRD1   | ENSG00000184845  | 52           |                   | gpc3   | ENSG00000147257  | 52          | 13                | Ep300   | ENSG00000100393  |
| 53          | 26                | DUSP3  | ENSG00000108861  | 53           |                   | gpnmb  | ENSG00000136235  | 53          |                   | Exosc4  | ENSG00000178896  |
| 54          | 27                | EPHA4  | ENSG00000116106  | 54           |                   | gpr143 | ENSG00000101850  | 54          |                   | Erbp2   | ENSG00000141736  |
| 55          | 28                | ERBB4  | ENSG00000178568  | 55           |                   | gpr161 | ENSG00000143147  | 55          |                   | Eya1    | ENSG00000104313  |
| 56          |                   | FGF2   | ENSG00000138685  | 56           | 19                | hdac1  | ENSG00000116478  | 56          | 14                | Fgfr1   | ENSG00000077782  |
| 57          |                   | FLNA   | ENSG00000196924  | 57           |                   | hps1   | ENSG00000107521  | 57          |                   | Fam32a  | ENSG00000105058  |
| 58          |                   | FMR1   | ENSG00000102081  | 58           |                   | hps3   | ENSG00000163755  | 58          |                   | Fbl     | ENSG00000105202  |
| 59          |                   | FOXP2  | ENSG00000128573  | 59           |                   | hps4   | ENSG00000100099  | 59          |                   | Fen1    | ENSG00000168496  |
| 60          | 29                | GABBR1 | ENSG00000204681  | 60           |                   | hps5   | ENSG00000110756  | 60          | 15                | Fgf10   | ENSG00000070193  |
| 61          | 30                | GABBR2 | ENSG00000136928  | 61           |                   | hps6   | ENSG00000166189  | 61          |                   | Foigr   | ENSG00000168538  |
| 62          |                   | GABRA1 | ENSG00000022355  | 62           |                   | ikbkg  | ENSG00000073009  | 62          |                   | Foxm1   | ENSG00000111206  |
| 63          |                   | GABRA4 | ENSG00000109158  | 63           | 20                | irf4   | ENSG00000137265  | 63          |                   | Gata4   | ENSG00000136574  |
| 64          |                   | GABRG1 | ENSG00000163285  | 64           | 21                | itgb1  | ENSG00000150093  | 64          |                   | Gata6   | ENSG00000141448  |
| 65          |                   | GABRG2 | ENSG00000113327  | 65           |                   | kcnj13 | ENSG00000115474  | 65          |                   | Gins3   | ENSG00000181938  |
| 66          | 31                | GABRG3 | ENSG00000182256  | 66           | 22                | kit    | ENSG00000157404  | 66          |                   | Gle1    | ENSG00000119392  |
| 67          |                   | GAP43  | ENSG00000172020  | 67           | 23                | kitlg  | ENSG00000049130  | 67          |                   | Gnl3    | ENSG00000163938  |
| 68          |                   | GDI1   | ENSG00000203879  | 68           |                   | lef1   | ENSG00000138795  | 68          |                   | Gnl3l   | ENSG00000130119  |
| 69          | 32                | GJA1   | ENSG00000152661  | 69           |                   | lmx1a  | ENSG00000162761  | 69          |                   | Gnpnat1 | ENSG00000100522  |

| Cognition   |                   |        |                  | Pigmentation |                   |        |                  | Liver       |                   |        |                  |
|-------------|-------------------|--------|------------------|--------------|-------------------|--------|------------------|-------------|-------------------|--------|------------------|
| gene number | dupl. gene number | gene   | human Ensembl ID | gene number  | dupl. gene number | gene   | human Ensembl ID | gene number | dupl. gene number | gene   | human Ensembl ID |
| 70          | 33                | GJA8   | ENSG00000121634  | 70           |                   | ltk    | ENSG00000062524  | 70          |                   | Gtpbp4 | ENSG00000107937  |
| 71          | 34                | GLUD1  | ENSG00000148672  | 71           |                   | lyst   | ENSG00000143669  | 71          |                   | Hdac3  | ENSG00000171720  |
| 72          | 35                | GNA13  | ENSG00000120063  | 72           |                   | mbtps1 | ENSG00000140943  | 72          |                   | Heatr1 | ENSG00000119285  |
| 73          | 36                | GNAI1  | ENSG00000127955  | 73           | 24                | mchr1  | ENSG00000128285  | 73          | 16                | Hes1   | ENSG00000114315  |
| 74          | 37                | GNAI2  | ENSG00000114353  | 74           |                   | mchr2  | ENSG00000152034  | 74          | 17                | Hgf    | ENSG00000019991  |
| 75          | 38                | GNAQ   | ENSG00000156052  | 75           |                   | mc1r   | ENSG00000198211  | 75          |                   | Hhex   | ENSG00000152804  |
| 76          | 39                | GNAS   | ENSG00000087460  | 76           | 25                | mcoln3 | ENSG00000055732  | 76          | 18                | Hinfp  | ENSG00000172273  |
| 77          |                   | GNPAT  | ENSG00000116906  | 77           | 26                | mgrn1  | ENSG00000102858  | 77          |                   | Hnf1a  | ENSG00000135100  |
| 78          | 40                | GPHN   | ENSG00000171723  | 78           | 27                | mitf   | ENSG00000187098  | 78          | 19                | Hnf1b  | ENSG00000108753  |
| 79          | 41                | GPI    | ENSG00000105220  | 79           | 28                | mlph   | ENSG00000115648  | 79          | 20                | Hspa8  | ENSG00000109971  |
| 80          | 42                | GRIA1  | ENSG00000155511  | 80           |                   | mreg   | ENSG00000118242  | 80          |                   | Hspa9b | ENSG00000113013  |
| 81          | 43                | GRIA2  | ENSG00000120251  | 81           | 29                | myc    | ENSG00000136997  | 81          |                   | Icmt   | ENSG00000116237  |
| 82          | 44                | GRIA3  | ENSG00000125675  | 82           |                   | mycbp2 | ENSG00000005810  | 82          |                   | Kars   | ENSG00000065427  |
| 83          | 45                | GRIA4  | ENSG00000152578  | 83           | 30                | myo5a  | ENSG00000197535  | 83          |                   | Kri1   | ENSG00000129347  |
| 84          | 46                | GRIN1  | ENSG00000176884  | 84           | 31                | myo7a  | ENSG00000137474  | 84          | 21                | Jag1   | ENSG00000101384  |
| 85          | 47                | GRIN2A | ENSG00000183454  | 85           | 32                | nsf    | ENSG00000073969  | 85          | 22                | Jag2   | ENSG00000184916  |
| 86          | 48                | GRIN2B | ENSG00000150086  | 86           |                   | oca2   | ENSG00000104044  | 86          | 23                | Jarid2 | ENSG00000008083  |
| 87          | 49                | GRIN2D | ENSG00000105464  | 87           | 33                | pabpc1 | ENSG00000070756  | 87          |                   | Klf1   | ENSG00000105610  |

| Cognition   |                   |         |                  | Pigmentation |                   |         |                  | Liver       |                   |         |                  |
|-------------|-------------------|---------|------------------|--------------|-------------------|---------|------------------|-------------|-------------------|---------|------------------|
| gene number | dupl. gene number | gene    | human Ensembl ID | gene number  | dupl. gene number | gene    | human Ensembl ID | gene number | dupl. gene number | gene    | human Ensembl ID |
| 88          | 50                | GRM2    | ENSG00000164082  | 88           |                   | paics   | ENSG00000128050  | 88          |                   | Lsr     | ENSG00000105699  |
| 89          | 51                | GRM5    | ENSG00000168959  | 89           | 34                | pax3    | ENSG00000135903  | 89          |                   | Ltv1    | ENSG00000135521  |
| 90          | 52                | GRM7    | ENSG00000196277  | 90           | 35                | pax7    | ENSG00000009709  | 90          |                   | Man2a1  | ENSG00000112893  |
| 91          | 53                | GSK3B   | ENSG00000082701  | 91           |                   | pcbd1   | ENSG00000166228  | 91          |                   | Mars    | ENSG00000166986  |
| 92          | 54                | HADHA   | ENSG00000084754  | 92           |                   | pcbd2   | ENSG00000132570  | 92          |                   | Mcm3ap  | ENSG00000160294  |
| 93          |                   | HFE2    | ENSG00000168509  | 93           |                   | pldn    | ENSG00000104164  | 93          |                   | Mcm7    | ENSG00000166508  |
| 94          | 55                | HOMER1  | ENSG00000152413  | 94           |                   | pmch    | ENSG00000183395  | 94          |                   | Med1    | ENSG00000125686  |
| 95          |                   | HOMER2  | ENSG00000103942  | 95           | 36                | pomc    | ENSG00000115138  | 95          |                   | Med12   | ENSG00000184634  |
| 96          |                   | HSD17B4 | ENSG00000133835  | 96           |                   | pts     | ENSG00000150787  | 96          |                   | Med14   | ENSG00000180182  |
| 97          |                   | HSPD1   | ENSG00000144381  | 97           | 37                | qdpr    | ENSG00000151552  | 97          | 24                | Mki2    | ENSG00000186260  |
| 98          | 56                | HTR1A   | ENSG00000178394  | 98           |                   | rab27a  | ENSG00000069974  | 98          |                   | Mybbp1a | ENSG00000132382  |
| 99          |                   | ITGA10  | ENSG00000143127  | 99           | 38                | rab38   | ENSG00000123892  | 99          | 25                | Mybl2   | ENSG00000101057  |
| 100         | 57                | KALRN   | ENSG00000160145  | 100          | 39                | rab32   | ENSG00000118508  | 100         |                   | Nar     | ENSG00000160917  |
| 101         | 58                | KCNQ2   | ENSG00000075043  | 101          |                   | rabggta | ENSG00000100949  | 101         |                   | Ncl     | ENSG00000115053  |
| 102         | 59                | KIF1A   | ENSG00000130294  | 102          |                   | rpl24   | ENSG00000114391  | 102         |                   | Ndufs5  | ENSG00000168653  |
| 103         | 60                | KIF5B   | ENSG00000170759  | 103          |                   | rps19   | ENSG00000105372  | 103         | 26                | Nf1     | ENSG00000196712  |
| 104         |                   | KRAS    | ENSG00000133703  | 104          |                   | rps20   | ENSG00000008988  | 104         |                   | Nf2     | ENSG00000186575  |
| 105         |                   | L1CAM   | ENSG00000198910  | 105          |                   | scarb2  | ENSG00000138760  | 105         |                   | Nfyc    | ENSG00000066136  |

| Cognition   |                   |         |                  | Pigmentation |                   |         |                       | Liver       |                   |         |                  |
|-------------|-------------------|---------|------------------|--------------|-------------------|---------|-----------------------|-------------|-------------------|---------|------------------|
| gene number | dupl. gene number | gene    | human Ensembl ID | gene number  | dupl. gene number | gene    | human Ensembl ID      | gene number | dupl. gene number | gene    | human Ensembl ID |
| 106         | 61                | LPHN1   | ENSG00000072071  | 106          |                   | sfxn1   | ENSG00000164466       | 106         |                   | Nkap    | ENSG00000189134  |
| 107         | 62                | LPHN3   | ENSG00000150471  | 107          | 40                | silver  | ENSG00000185664       | 107         |                   | Nmd3    | ENSG00000169251  |
| 108         |                   | LRPPRC  | ENSG00000138095  | 108          |                   | skiv2l2 | ENSG00000039123       | 108         |                   | Noc3l   | ENSG00000173145  |
| 109         |                   | LSAMP   | ENSG00000185565  | 109          | 41                | slc24a4 | ENSG00000140090       | 109         |                   | Nol10   | ENSG00000115761  |
| 110         |                   | MACROD1 | ENSG00000133315  | 110          |                   | slc24a5 | ENSG00000188467       | 110         |                   | Nop10   | ENSG00000182117  |
| 111         |                   | MACROD2 | ENSG00000172264  | 111          |                   | slc45a2 | ENSG00000164175       | 111         |                   | Notch2  | ENSG00000134250  |
| 112         | 63                | MAGI2   | ENSG00000187391  | 112          | 42                | smtl    | not detected in human | 112         |                   | Notch3  | ENSG00000074181  |
| 113         |                   | MAOA    | ENSG00000189221  | 113          |                   | snai2   | ENSG00000019549       | 113         |                   | Nup205  | ENSG00000155561  |
| 114         | 64                | MAP1A   | ENSG00000166963  | 114          | 43                | sox9    | ENSG00000125398       | 114         |                   | Onecut1 | ENSG00000169856  |
| 115         |                   | MAP1B   | ENSG00000131711  | 115          | 44                | sox10   | ENSG00000100146       | 115         |                   | Onecut2 | ENSG00000119547  |
| 116         | 65                | MAPT    | ENSG00000186868  | 116          |                   | sox18   | ENSG00000203883       | 116         |                   | Paf1    | ENSG00000006712  |
| 117         |                   | MECP2   | ENSG00000169057  | 117          | 45                | spr     | ENSG00000116096       | 117         | 27                | Pbx4    | ENSG00000105717  |
| 118         | 66                | MYO5A   | ENSG00000197535  | 118          |                   | tfap2a  | ENSG00000137203       | 118         |                   | Pcsk2   | ENSG00000125851  |
| 119         | 67                | NCAM1   | ENSG00000149294  | 119          |                   | tpcn2   | ENSG00000162341       | 119         |                   | Pes1    | ENSG00000100029  |
| 120         |                   | NCAM2   | ENSG00000154654  | 120          |                   | trim33  | ENSG00000197323       | 120         | 28                | Pkm2    | ENSG00000067225  |
| 121         |                   | NDUFA2  | ENSG00000131495  | 121          | 46                | trpm1   | ENSG00000134160       | 121         |                   | Polr1c  | ENSG00000171453  |
| 122         | 68                | NDUFS1  | ENSG00000023228  | 122          |                   | trpm7   | ENSG00000092439       | 122         |                   | Polr1d  | ENSG00000186184  |
| 123         |                   | NDUFS3  | ENSG00000213619  | 123          |                   | muted   | ENSG00000188428       | 123         |                   | Polr3f  | ENSG00000132664  |

| Cognition   |                   |              |                        | Pigmentation |                   |              |                        | Liver       |                   |              |                        |
|-------------|-------------------|--------------|------------------------|--------------|-------------------|--------------|------------------------|-------------|-------------------|--------------|------------------------|
| gene number | dupl. gene number | gene         | human Ensembl ID       | gene number  | dupl. gene number | gene         | human Ensembl ID       | gene number | dupl. gene number | gene         | human Ensembl ID       |
| 124         |                   | NDUFS7       | ENSG00000115286        | <b>124</b>   | <b>47</b>         | <b>tyr</b>   | <b>ENSG00000077498</b> | <b>124</b>  | <b>29</b>         | <b>Ppm1k</b> | <b>ENSG00000163644</b> |
| <b>125</b>  | <b>69</b>         | <b>NEFL</b>  | <b>pseudogene</b>      | <b>125</b>   | <b>48</b>         | <b>tyrp1</b> | <b>ENSG00000107165</b> | 125         |                   | Ppp1r12a     | ENSG00000058272        |
| 126         |                   | NIPA2        | ENSG00000140157        | 126          |                   | vps11        | ENSG00000160695        | 126         |                   | Prpf3        | ENSG00000117360        |
| <b>127</b>  | <b>70</b>         | <b>NLGN2</b> | <b>ENSG00000169992</b> | 127          |                   | vps18        | ENSG00000104142        | 127         |                   | Psmb1        | ENSG00000008018        |
| <b>128</b>  | <b>71</b>         | <b>NLGN3</b> | <b>ENSG00000196338</b> | 128          |                   | vps33a       | ENSG00000139719        | 128         |                   | Psmc6        | ENSG00000100519        |
| 129         |                   | NRG1         | ENSG00000157168        | 129          |                   | vps39        | ENSG00000166887        | 129         |                   | Qars         | ENSG00000172053        |
| <b>130</b>  | <b>72</b>         | <b>NRXN1</b> | <b>ENSG00000179915</b> | 130          |                   | wnt1         | ENSG00000125084        | 130         |                   | Rae1         | ENSG00000101146        |
| <b>131</b>  | <b>73</b>         | <b>NRXN3</b> | <b>ENSG00000021645</b> | 131          |                   | wnt3a        | ENSG00000154342        | 131         |                   | Rb1cc1       | ENSG00000023287        |
| <b>132</b>  | <b>74</b>         | <b>PCDH1</b> | <b>ENSG00000156453</b> | 132          |                   | xdh          | ENSG00000158125        | 132         |                   | Rbm19        | ENSG00000122965        |
| <b>133</b>  | <b>75</b>         | <b>PDE4B</b> | <b>ENSG00000184588</b> | <b>133</b>   | <b>49</b>         | <b>zic2</b>  | <b>ENSG00000043355</b> | 133         |                   | Rbm42        | ENSG00000126254        |
| 134         |                   | PDE8A        | ENSG00000073417        |              |                   |              |                        | 134         |                   | Rbp4         | ENSG00000138207        |
| <b>135</b>  | <b>76</b>         | <b>PDHA1</b> | <b>ENSG00000131828</b> |              |                   |              |                        | 135         |                   | Rcl          | ENSG00000112667        |
| 136         |                   | PEX11B       | ENSG00000131779        |              |                   |              |                        | 136         |                   | Rela         | ENSG00000173039        |
| 137         |                   | PGK1         | ENSG00000102144        |              |                   |              |                        | 137         |                   | Rnf113a      | ENSG00000125352        |
| 138         |                   | PHGDH        | ENSG00000092621        |              |                   |              |                        | 138         |                   | Rpgrip1l     | ENSG00000103494        |
| <b>139</b>  | <b>77</b>         | <b>PI4KA</b> | <b>ENSG00000241973</b> |              |                   |              |                        | 139         |                   | Rpl9         | ENSG00000163682        |
| <b>140</b>  | <b>78</b>         | <b>PLD5</b>  | <b>ENSG00000180287</b> |              |                   |              |                        | 140         |                   | Rpl11        | ENSG00000142676        |
| <b>141</b>  | <b>79</b>         | <b>PLP1</b>  | <b>ENSG00000123560</b> |              |                   |              |                        | 141         |                   | Rpl12        | ENSG00000197958        |

| Cognition   |                   |                |                        | Pigmentation |                   |      |                  | Liver       |                   |                |                        |
|-------------|-------------------|----------------|------------------------|--------------|-------------------|------|------------------|-------------|-------------------|----------------|------------------------|
| gene number | dupl. gene number | gene           | human Ensembl ID       | gene number  | dupl. gene number | gene | human Ensembl ID | gene number | dupl. gene number | gene           | human Ensembl ID       |
| 142         |                   | POLR3C         | ENSG00000186141        |              |                   |      |                  | 142         |                   | Rplp1          | ENSG00000137818        |
| <b>143</b>  | <b>80</b>         | <b>POLR3GL</b> | <b>ENSG00000121851</b> |              |                   |      |                  | 143         |                   | Rprd1b         | ENSG00000101413        |
| 144         |                   | POU6F2         | ENSG00000106536        |              |                   |      |                  | 144         |                   | Rps11          | ENSG00000142534        |
| 145         |                   | PRKAB2         | ENSG00000131791        |              |                   |      |                  | 145         |                   | Rpsa           | ENSG00000168028        |
| 146         |                   | PRKCG          | ENSG00000126583        |              |                   |      |                  | 146         |                   | Rrp1           | ENSG00000160208        |
| <b>147</b>  | <b>81</b>         | <b>PRODH</b>   | <b>ENSG00000100033</b> |              |                   |      |                  | 147         |                   | Runx1          | ENSG00000159216        |
| <b>148</b>  | <b>82</b>         | <b>PTEN</b>    | <b>ENSG00000171862</b> |              |                   |      |                  | 148         |                   | Ruvbl2         | ENSG00000183207        |
| 149         |                   | PTPN11         | ENSG00000179295        |              |                   |      |                  | <b>149</b>  | <b>30</b>         | <b>Rxra</b>    | <b>ENSG00000186350</b> |
| 150         |                   | RAB1A          | ENSG00000138069        |              |                   |      |                  | 150         |                   | Sars           | ENSG00000031698        |
| 151         |                   | RAB3GAP2       | ENSG00000118873        |              |                   |      |                  | 151         |                   | Scarb2         | ENSG00000138760        |
| 152         |                   | RAPGEF2        | ENSG00000109756        |              |                   |      |                  | 152         |                   | Sdad1          | ENSG00000198301        |
| 153         |                   | RELN           | ENSG00000189056        |              |                   |      |                  | 153         |                   | Sec61a         | ENSG00000058262        |
| <b>154</b>  | <b>83</b>         | <b>ROCK2</b>   | <b>ENSG00000134318</b> |              |                   |      |                  | 154         |                   | Sf1            | ENSG00000168066        |
| <b>155</b>  |                   | <b>SEC22B</b>  | <b>ENSG00000223380</b> |              |                   |      |                  | 155         |                   | Skp1a          | ENSG00000113558        |
| 156         |                   | SEMA5A         | ENSG00000112902        |              |                   |      |                  | <b>156</b>  | <b>31</b>         | <b>Slc25a5</b> | <b>ENSG00000005022</b> |
| <b>157</b>  | <b>84</b>         | <b>SHANK2</b>  | <b>ENSG00000162105</b> |              |                   |      |                  | 157         |                   | Slco1b1        | ENSG00000134538        |
| <b>158</b>  | <b>85</b>         | <b>SHANK3</b>  | <b>ENSG00000251322</b> |              |                   |      |                  | 158         |                   | Smarca5        | ENSG00000153147        |
| <b>159</b>  | <b>86</b>         | <b>SLC1A3</b>  | <b>ENSG00000079215</b> |              |                   |      |                  | 159         |                   | Sod2           | ENSG00000112096        |



| Cognition   |                   |                |                        | Pigmentation |                   |      |                  | Liver       |                   |              |                              |
|-------------|-------------------|----------------|------------------------|--------------|-------------------|------|------------------|-------------|-------------------|--------------|------------------------------|
| gene number | dupl. gene number | gene           | human Ensembl ID       | gene number  | dupl. gene number | gene | human Ensembl ID | gene number | dupl. gene number | gene         | human Ensembl ID             |
| 160         |                   | SLC25A12       | ENSG00000115840        |              |                   |      |                  | <b>160</b>  | <b>32</b>         | <b>Sox9</b>  | <b>ENSG00000125398</b>       |
| 161         |                   | SLC25A4        | ENSG00000151729        |              |                   |      |                  | 161         |                   | Sp1          | ENSG00000185591              |
| 162         |                   | SLC6A4         | ENSG00000108576        |              |                   |      |                  | <b>162</b>  | <b>33</b>         | <b>Sp3</b>   | <b>ENSG00000172845</b>       |
| <b>163</b>  | <b>87</b>         | <b>SNAP25</b>  | <b>ENSG00000132639</b> |              |                   |      |                  | 163         |                   | Sptan1       | ENSG00000197694              |
| 164         |                   | ST8SIA2        | ENSG00000140557        |              |                   |      |                  | 164         |                   | Spns1        | ENSG00000169682              |
| 165         |                   | STX1A          | ENSG00000106089        |              |                   |      |                  | <b>165</b>  | <b>34</b>         | <b>Stat5</b> | <b>ENSG00000126561</b>       |
| <b>166</b>  | <b>88</b>         | <b>STXBP5</b>  | <b>ENSG00000164506</b> |              |                   |      |                  | 166         |                   | Surf6        | ENSG00000148296              |
| <b>167</b>  | <b>89</b>         | <b>SV2A</b>    | <b>ENSG00000159164</b> |              |                   |      |                  | 167         |                   | Taf1b        | ENSG00000115750              |
| 168         |                   | SYN1           | ENSG00000008056        |              |                   |      |                  | 168         |                   | Taf2         | ENSG00000064313              |
| <b>169</b>  | <b>90</b>         | <b>SYNE1</b>   | <b>ENSG00000131018</b> |              |                   |      |                  | 169         |                   | Taf8         | ENSG00000137413              |
| <b>170</b>  | <b>91</b>         | <b>SYNGAP1</b> | <b>ENSG00000197283</b> |              |                   |      |                  | <b>170</b>  | <b>35</b>         | <b>Tbx16</b> | <b>not detected in human</b> |
| <b>171</b>  | <b>92</b>         | <b>SYP</b>     | <b>ENSG00000102003</b> |              |                   |      |                  | 171         |                   | Tgfbr3       | ENSG00000069702              |
| <b>172</b>  | <b>93</b>         | <b>SYT1</b>    | <b>ENSG00000067715</b> |              |                   |      |                  | 172         |                   | Thoc2        | ENSG00000125676              |
| 173         |                   | TAF1C          | ENSG00000103168        |              |                   |      |                  | 173         |                   | Ttk          | ENSG00000112742              |
| 174         |                   | TPH2           | ENSG00000139287        |              |                   |      |                  | 174         |                   | Tubg2        | ENSG00000037042              |
| <b>175</b>  | <b>94</b>         | <b>TPI1</b>    | <b>ENSG00000111669</b> |              |                   |      |                  | 175         |                   | Ufd1l        | ENSG00000070010              |
| <b>176</b>  | <b>95</b>         | <b>TSC1</b>    | <b>ENSG00000165699</b> |              |                   |      |                  | 176         |                   | Uhrf1        | ENSG00000034063              |

| Cognition   |                   |               |                        | Pigmentation |                   |      |                  | Liver       |                   |                |                        |
|-------------|-------------------|---------------|------------------------|--------------|-------------------|------|------------------|-------------|-------------------|----------------|------------------------|
| gene number | dupl. gene number | gene          | human Ensembl ID       | gene number  | dupl. gene number | gene | human Ensembl ID | gene number | dupl. gene number | gene           | human Ensembl ID       |
| 177         | 96                | <b>TSPAN7</b> | <b>ENSG00000156298</b> |              |                   |      |                  | 177         |                   | Utp11l         | ENSG00000183520        |
| 178         |                   | UBA1          | ENSG00000130985        |              |                   |      |                  | 178         |                   | Vps18          | ENSG00000104142        |
| 179         | 97                | <b>UBE2N</b>  | <b>ENSG00000177889</b> |              |                   |      |                  | 179         |                   | Vps39          | ENSG00000166887        |
| 180         |                   | UBE2M         | ENSG00000130725        |              |                   |      |                  | 180         |                   | Vwf            | ENSG00000110799        |
| 181         |                   | UBE2V2        | ENSG00000169139        |              |                   |      |                  | 181         |                   | Wnt2b          | ENSG00000134245        |
| 182         |                   | UBE3C         | ENSG00000009335        |              |                   |      |                  | 182         |                   | Wdr33          | ENSG00000136709        |
| 183         |                   | UBE4A         | ENSG00000110344        |              |                   |      |                  | 183         |                   | Wdr36          | ENSG00000134987        |
| 184         |                   | UBL4A         | ENSG00000102178        |              |                   |      |                  | 184         |                   | Wdr46          | ENSG00000204221        |
| 185         |                   | UBR4          | ENSG00000127481        |              |                   |      |                  | <b>185</b>  | <b>36</b>         | <b>Wdr68</b>   | <b>ENSG00000136485</b> |
| 186         |                   | UBXN6         | ENSG00000167671        |              |                   |      |                  | <b>186</b>  | <b>37</b>         | <b>Zcchc7l</b> | <b>ENSG00000147905</b> |
| 187         |                   | UCHL1         | ENSG00000154277        |              |                   |      |                  | 187         |                   | Zmat2          | ENSG00000146007        |
| 188         |                   | VCP           | ENSG00000165280        |              |                   |      |                  |             |                   |                |                        |
| 189         | 98                | <b>YWHAB</b>  | <b>ENSG00000166913</b> |              |                   |      |                  |             |                   |                |                        |
| 190         | 99                | <b>YWHAE</b>  | <b>ENSG00000108953</b> |              |                   |      |                  |             |                   |                |                        |

**Supplementary Table 8A: Human genes that show copy number variations (CNV)**

|                          | <b>CNV genes</b> | <b>total</b> | <b>%</b> |
|--------------------------|------------------|--------------|----------|
| all genes genome         | 8890             | 20038        | 44,4     |
|                          |                  |              |          |
| all genes this study     | 177              | 491          | 36,0     |
| all TGD genes this study | 65               | 177          | 36,7     |
| singletons this study    | 112              | 314          | 35,7     |
|                          |                  |              |          |
| cognition genes          | 63               | 192          | 32,8     |
| cognition genes TGD      | 31               | 99           | 31,3     |
| cognition singletons     | 32               | 93           | 34,4     |
|                          |                  |              |          |
| pigmentation genes       | 48               | 129          | 37,2     |
| pigmentation genes TGD   | 20               | 47           | 42,6     |
| pigmentation singletons  | 28               | 82           | 34,1     |
|                          |                  |              |          |
| liver genes              | 71               | 185          | 38,4     |
| liver genes TGD          | 16               | 36           | 44,4     |
| liver singletons         | 55               | 149          | 36,9     |

**Supplementary Table 8B: Zebrafish genes that show copy number variations (CNV)**

|                          | <b>CNV genes</b> | <b>total</b> | <b>%</b> |
|--------------------------|------------------|--------------|----------|
| all genes genome         | 2681             | 25325        | 10,6     |
|                          |                  |              |          |
| all genes this study     | 31               | 658          | 4,7      |
| all TGD genes this study | 18               | 343          | 5,2      |
| all genes singleton      | 13               | 315          | 4,1      |
|                          |                  |              |          |
| cognition genes          | 14               | 286          | 4,9      |

|                         | <b>CNV genes</b> | <b>total</b> | <b>%</b> |
|-------------------------|------------------|--------------|----------|
| cognition genes TGD     | 11               | 194          | 5,7      |
| cognition singletons    | 3                | 92           | 3,3      |
|                         |                  |              |          |
| pigmentation genes      | 5                | 173          | 2,9      |
| pigmentation genes TGD  | 4                | 91           | 4,4      |
| pigmentation singletons | 1                | 82           | 1,2      |
|                         |                  |              |          |
| liver genes             | 13               | 218          | 6,0      |
| liver genes TGD         | 4                | 68           | 5,9      |
| liver singletons        | 9                | 150          | 6,0      |

**Supplementary Table 9: Human genes being members of protein complexes that have corresponding TGD paralogs or singletons in the three fish functional categories**

|                          | <b>Protein complex member</b> | <b>total</b> | <b>%</b> |
|--------------------------|-------------------------------|--------------|----------|
| all genes genome         | 2665                          | 20038        | 13,3     |
|                          |                               |              |          |
| all genes this study     | 191                           | 491          | 38,9     |
| all TGD genes this study | 74                            | 176          | 42,0     |
| all genes singleton      | 117                           | 315          | 37,1     |
|                          |                               |              |          |
| cognition genes          | 80                            | 192          | 41,7     |
| cognition genes TGD      | 45                            | 99           | 45,5     |
| cognition singletons     | 35                            | 93           | 37,6     |
|                          |                               |              |          |
| pigmentation genes       | 40                            | 129          | 31,0     |
| pigmentation genes TGD   | 20                            | 47           | 42,6     |
| pigmentation singletons  | 20                            | 82           | 24,4     |

|                  | <b>Protein complex member</b> | <b>total</b> | <b>%</b> |
|------------------|-------------------------------|--------------|----------|
| liver genes      | 76                            | 185          | 41,1     |
| liver genes TGD  | 11                            | 36           | 30,6     |
| liver singletons | 65                            | 149          | 43,6     |

**Supplementary Table 10: Lengths of human proteins that have corresponding TGD paralogs or singletons in the three fish functional categories**

|                     | <b>TGD paralogs</b> |       | <b>singletons</b>   |       |              |       |
|---------------------|---------------------|-------|---------------------|-------|--------------|-------|
|                     | genes               | %     | genes               | %     |              |       |
| short (<200aa)      | 9                   | 5,14  | 42                  | 13,46 |              |       |
| middle (200-1000aa) | 120                 | 68,57 | 208                 | 66,67 |              |       |
| long (>1000aa)      | 46                  | 26,29 | 62                  | 19,87 |              |       |
| total               | 175                 |       | 312                 |       |              |       |
|                     | <b>cognition</b>    |       | <b>pigmentation</b> |       | <b>liver</b> |       |
|                     | genes               | %     | genes               | %     | genes        | %     |
| short (<200aa)      | 11                  | 5,79  | 19                  | 27,41 | 23           | 12,57 |
| middle (200-1000aa) | 124                 | 65,26 | 86                  | 67,19 | 128          | 69,95 |
| long (>1000aa)      | 55                  | 28,95 | 23                  | 17,97 | 32           | 17,49 |
| total               | 190                 |       | 128                 |       | 183          |       |

**Supplementary Table 11. Non-coding RNAs in the genome and in the transcriptome**

| <b>ncRNA type</b> | <b>Genome</b> | <b>Transcriptome</b> |
|-------------------|---------------|----------------------|
| tRNA              | 535           | n.a.                 |
| rRNA              | 51            | 21                   |
| miRNA             | 611           | n.a.                 |
| snRNA             | 38            | 17                   |
| snoRNA            | 229           | 109                  |

**Supplementary Table 12. tRNA statistics in the genome assembly**

| <b>Amino Acids</b> | <b>anticodon loops</b> | <b>Numbers<sup>1</sup></b> |
|--------------------|------------------------|----------------------------|
| Ala                | TGC                    | 19                         |
|                    | GGC                    | 1                          |
|                    | CGC                    | 3                          |
|                    | AGC                    | 7                          |
| Arg                | CCT                    | 8                          |
|                    | TCT                    | 10                         |
|                    | CCG                    | 3                          |
|                    | ACG                    | 7                          |
|                    | TCG                    | 8                          |
| Asn                | GTT                    | 12                         |
| Asp                | ATC                    | 8                          |
|                    | GTC                    | 137                        |
| Cys                | GCA                    | 12                         |
| Gln                | CTG                    | 6                          |
|                    | TTG                    | 2                          |
| Glu                | TTC                    | 8                          |
|                    | CTC                    | 15                         |
| Gly                | CCC                    | 2                          |
|                    | TCC                    | 8                          |
|                    | GCC                    | 11                         |
| His                | GTG                    | 12                         |
| Ile                | TAT                    | 14                         |
|                    | AAT                    | 30                         |
|                    | GAT                    | 1                          |
| Leu                | AAG                    | 8                          |
|                    | TAG                    | 3                          |
|                    | TAA                    | 8                          |
|                    | CAG                    | 9                          |
|                    | CAA                    | 4                          |
| Lys                | CTT                    | 11                         |
|                    | TTT                    | 9                          |
| Met                | CAT                    | 16                         |
| Phe                | GAA                    | 5                          |
| Pro                | AGG                    | 10                         |
|                    | TGG                    | 14                         |
|                    | CGG                    | 5                          |
| Ser                | AGA                    | 7                          |
|                    | CGA                    | 5                          |
|                    | GCT                    | 8                          |
|                    | TGA                    | 2                          |
|                    | ACT                    | 1                          |
| Thr                | CGT                    | 3                          |
|                    | TGT                    | 16                         |
|                    | AGT                    | 11                         |
| Trp                | CCA                    | 11                         |
| Tyr                | GTA                    | 9                          |
| Val                | TAC                    | 5                          |
|                    | CAC                    | 5                          |
|                    | AAC                    | 6                          |

<sup>1</sup> number of tRNA genes per codons

**Supplementary Table 13. Transcript reads used for Tophat gene models**

|                              | Heart         | Liver         | Brain         | Mixed 60mers <sup>1</sup> | Mixed 76mers <sup>2</sup> |
|------------------------------|---------------|---------------|---------------|---------------------------|---------------------------|
| Format                       | SIPES         | SIPES         | SIPES         | SIPES                     | Single end                |
| Number of reads              | 71,954,940    | 68,992,472    | 73,224,886    | 154,390,166               | 44,178,317                |
| Read length                  | 60            | 60            | 60            | 60                        | 76                        |
| Number nucleotides           | 4,317,296,400 | 4,139,548,320 | 4,393,493,160 | 9,263,409,9600            | 3,357,552,000             |
| Number potential transcripts | 156,433       | 119,681       | 170,818       | 241,093                   | 292,258                   |
| No coverage cutoff           |               |               |               |                           |                           |
| Number potential transcripts | 64,021        | 33,374        | 72,008        | 90,314                    | 43,524                    |
| -3x coverage cutoff          |               |               |               |                           |                           |

<sup>1</sup> From adult ovary and testes and from embryos at stage 15 and stage 25 of development

<sup>2</sup> From five day and one month old mixed sexes, nine month old females, and 15 month old males

**Supplementary Table 14. Tree taxon IDs and cluster codes**

| <b>Taxon ID</b> | <b>Organism</b>                      |
|-----------------|--------------------------------------|
| 1               | <i>Strongylocentrotus purpuratus</i> |
| 2               | <i>Ciona intestinalis</i>            |
| 3               | <i>Xiphophorus maculatus</i>         |
| 4               | <i>Oryzias latipes</i>               |
| 5               | <i>Gasterosteus aculeatus</i>        |
| 6               | <i>Tetraodon nigroviridis</i>        |
| 7               | <i>Danio rerio</i>                   |
| 8               | <i>Xenopus tropicalis</i>            |
| 9               | <i>Gallus gallus</i>                 |
| 10              | <i>Monodelphis domestica</i>         |
| 11              | <i>Mus musculus</i>                  |
| 12              | <i>Homo sapiens</i>                  |

| <b>Cluster level</b> | <b>Outgroup(s)</b> | <b>Ingroup(s)</b>                  |
|----------------------|--------------------|------------------------------------|
| 1                    | 1                  | 2, 3, 4, 5, 6, 7, 8, 9, 10, 11, 12 |
| 2                    | 2                  | 3, 4, 5, 6, 7, 8, 9, 10, 11, 12    |
| 3                    | 8                  | 9, 10, 11, 12                      |
| 4                    | 9                  | 10, 11, 12                         |
| 5                    | 10                 | 11, 12                             |
| 6                    | 11                 | 12                                 |
| 7                    | 8, 9, 10, 11, 12   | 3, 4, 5, 6, 7                      |
| 8                    | 7                  | 3, 4, 5, 6                         |
| 9                    | 5,6                | 3, 4                               |
| 10                   | 5                  | 6                                  |
| 11                   | 4                  | 3                                  |
| 12                   | 1                  | 1                                  |
| 13                   | 2                  | 2                                  |
| 14                   | 8                  | 8                                  |
| 15                   | 9                  | 9                                  |
| 16                   | 10                 | 10                                 |
| 17                   | 11                 | 11                                 |
| 18                   | 12                 | 12                                 |
| 19                   | 7                  | 7                                  |
| 20                   | 5                  | 5                                  |
| 21                   | 6                  | 6                                  |
| 22                   | 4                  | 4                                  |
| 23                   | 3                  | 3                                  |



**Supplementary Table 15. Quantity of clusters of different sizes when clustered by a distance of 1kb**

| <b>Cluster size</b> | <b>Members</b> |
|---------------------|----------------|
| 1                   | 3326           |
| 2                   | 127            |
| 3                   | 24             |
| 4                   | 4              |
| 6                   | 1              |

## SUPPLEMENTARY FIGURES

### Supplementary Figure 1: Phylogenetic tree of *X. maculatus* Long Interspersed Nuclear Elements (LINE) based on reverse transcriptase alignment

Protein sequences were aligned with ClustalW and a phylogenetic tree was constructed on 136 amino acids with the PhyML package using maximum likelihood methods<sup>53</sup> with default bootstrap calculation (shown at the beginning of branches). Platyfish elements are written in red and names of the elements start with “Xm” prefix. Boxes highlight the different apurinic-apyrimidic endonuclease (Jockey, Maui, CR1, ReO6/Babar, L1, Rex3/RTE and Tx-1) and Restriction Enzyme-Like (REL)-endonuclease (R2 and R4).

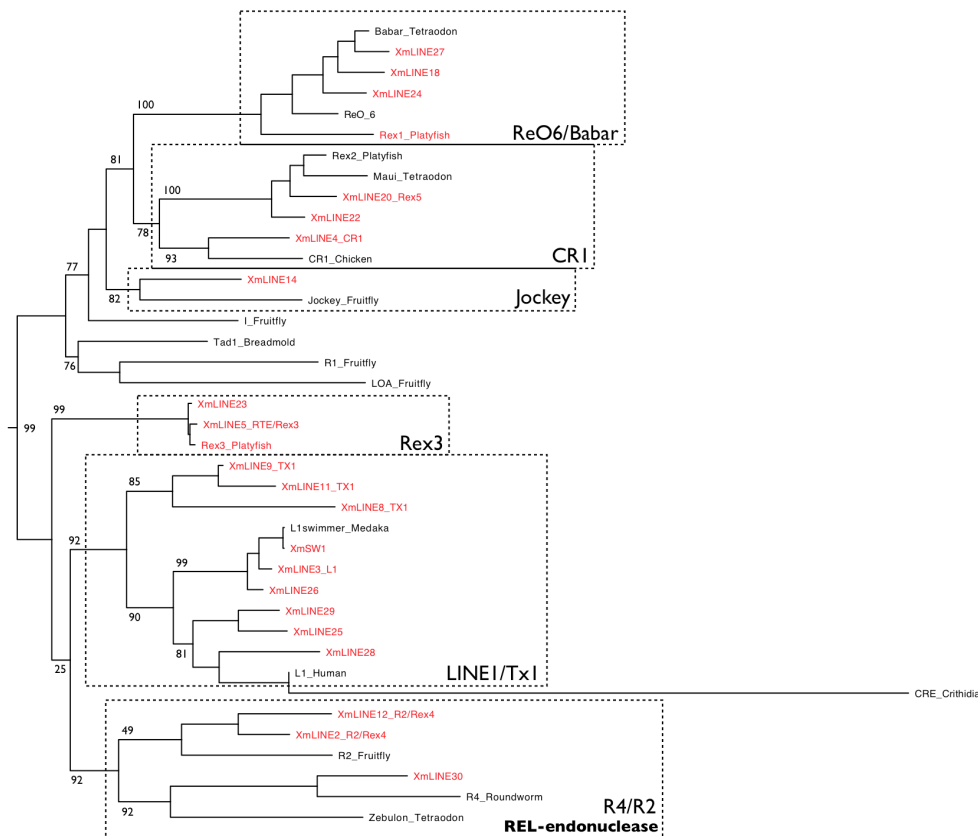



### Supplementary Figure 3: Phylogenetic tree of *X. maculatus* DNA transposons based on transposase alignment

Protein sequences were aligned with ClustalW (307 amino acids) and a phylogenetic tree was constructed with the PhyML package using maximum likelihood methods<sup>53</sup> with default bootstrap calculation (shown at the beginning of branches). Platyfish elements are written in red and names of the elements start with the “Xm” prefix.

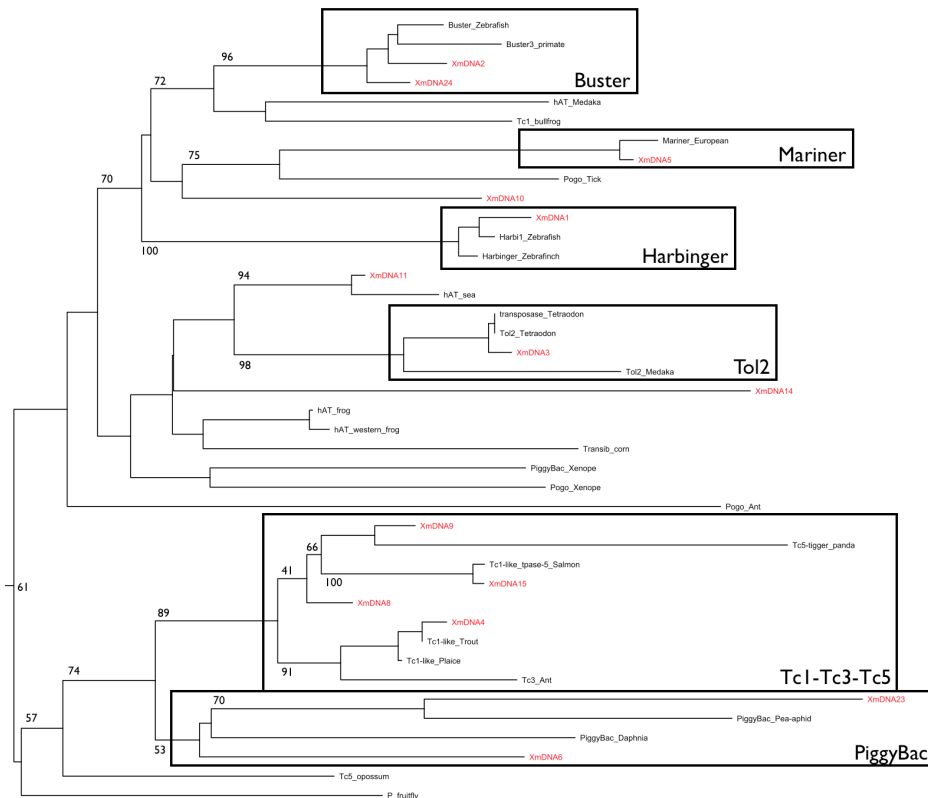

## Supplementary Figure 4: Split conservation of chromosomal location between platyfish and medaka or stickleback chromosomes

Dotplots reveal small discrepancies between platyfish (Xma) and medaka (Ola) or stickleback (Gac) chromosomes. Orthologs of genes on platyfish chromosomes Xma6, (A, B) Xma10 (E, F), Xma14 (C, D), Xma18 (G, H) are mostly on single other medaka or stickleback chromosomes but have small portions that reside on a second medaka or stickleback chromosome.

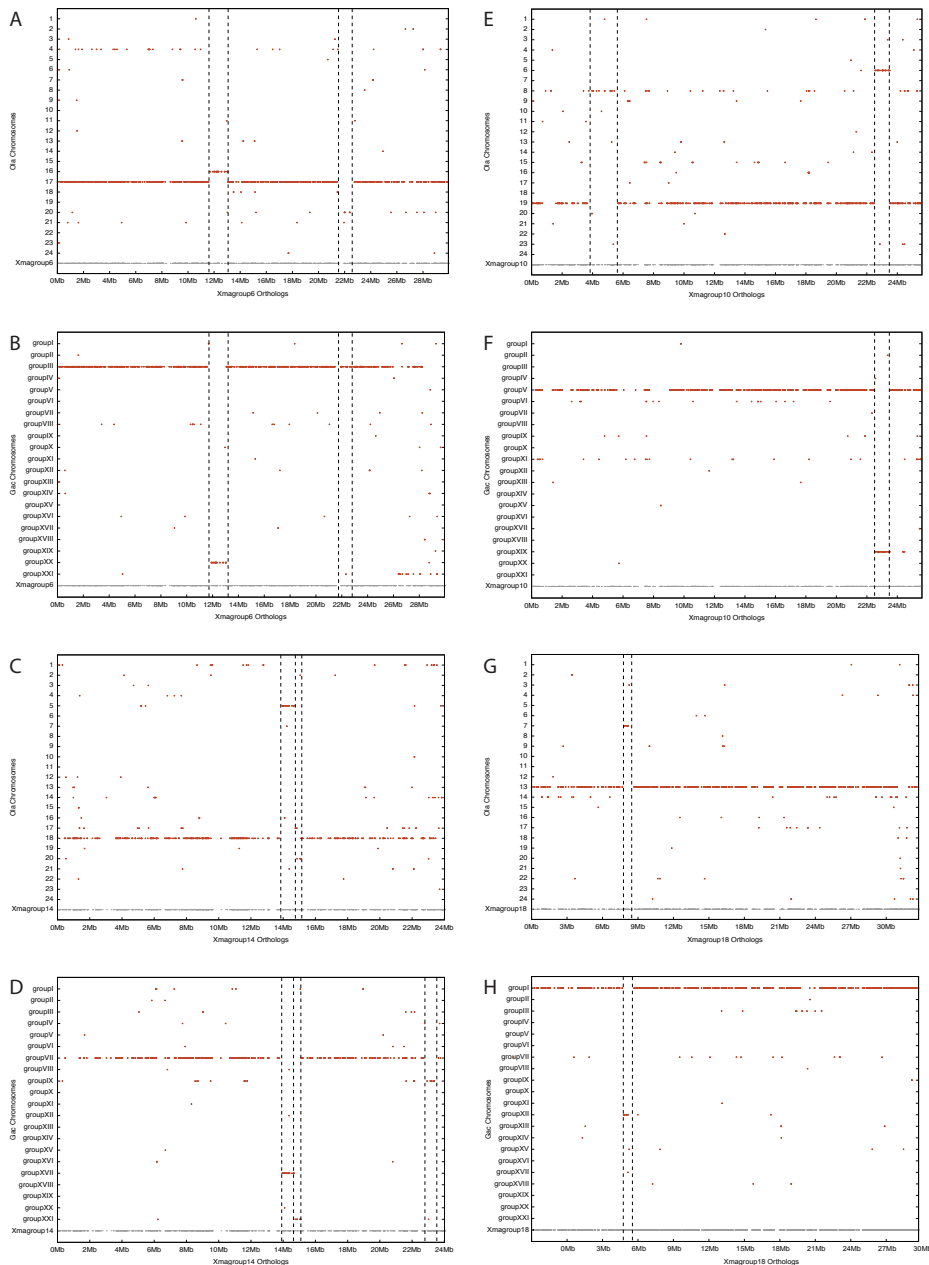

**Supplementary Figure 5: Posterior probabilities for viviparity genes under positive selection using branch site model**

For each amino acid site, there are four probabilities calculated by Bayes Empirical Bayes analysis. Class 1 (yellow) is the probability of this site being under purifying selection ( $k_a/k_s$  ratio about 0), class 2 (grey) is the probability of this site being under natural selection ( $k_a/k_s$  ratio about 1), class 3 (red) is the probability of this site being under positive selection in the analyzed *Xiphophorus* species. (A) *vitellogenin1*, (B) *igf2*, (C) *pparg*, (D) *ncoa6*, (E) *choriolyisinL*, (F) *choriolyisinH*, (G) *zvep*, (H) *caudal type homeobox 4 (cdx4)*. Known functional protein domains are indicated as bars.

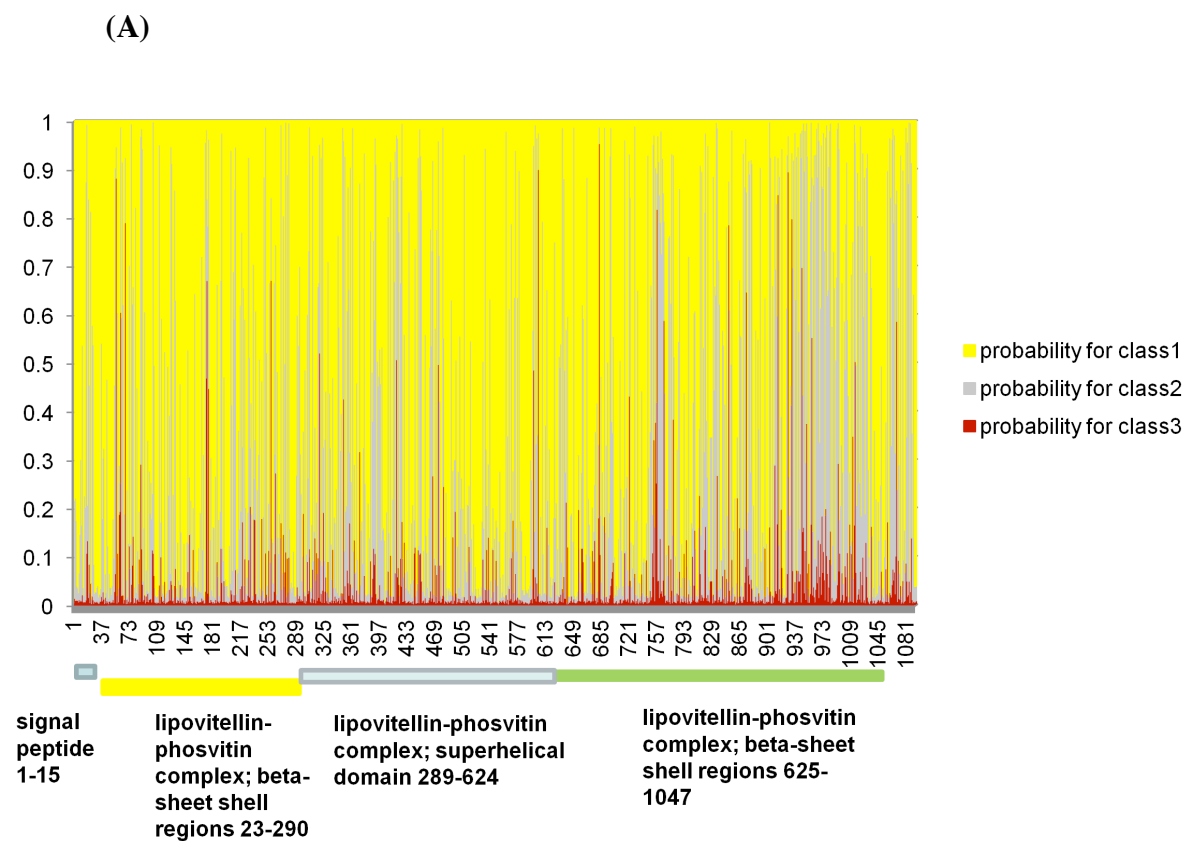

(B)

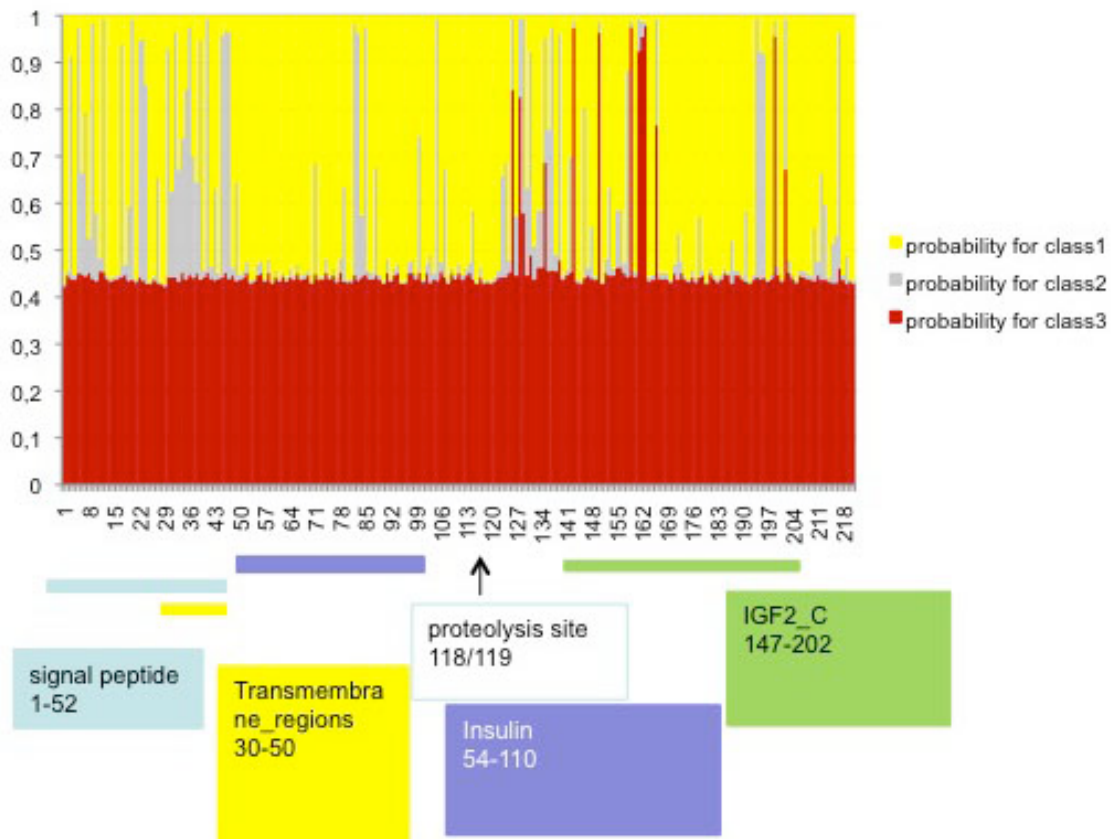

(C)

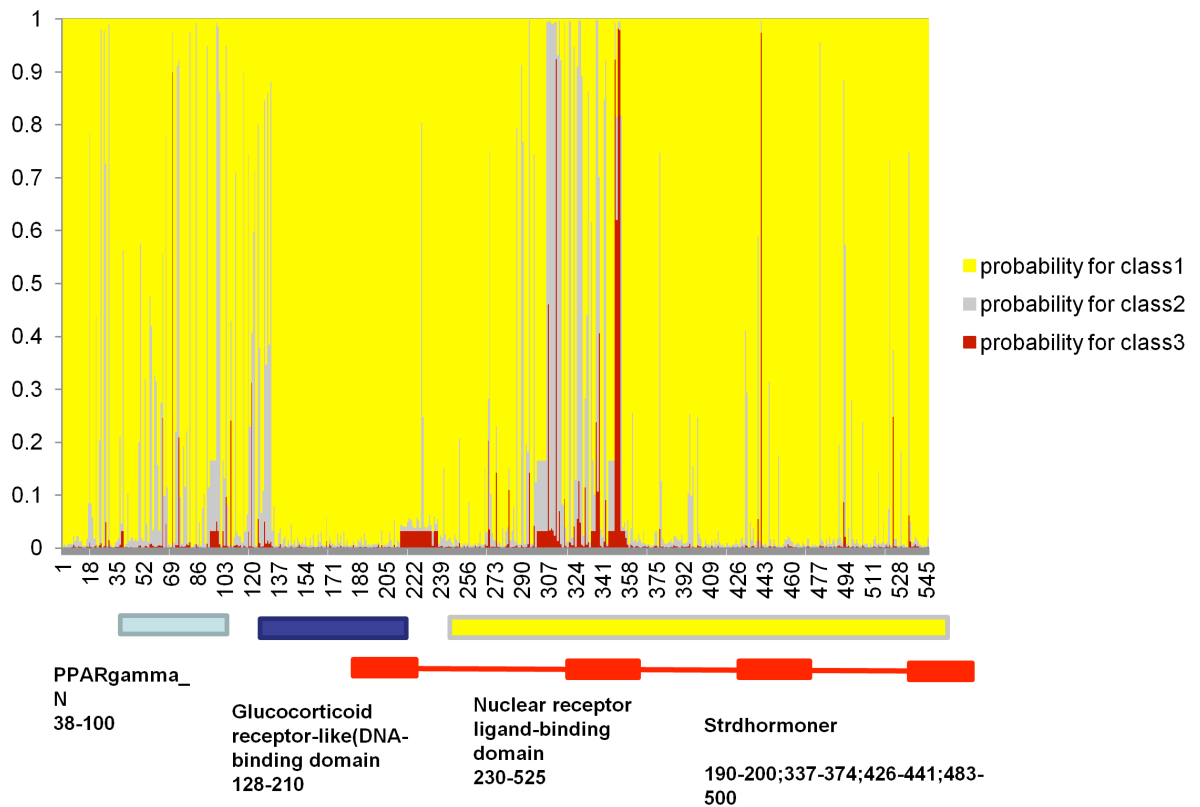

**(D)**

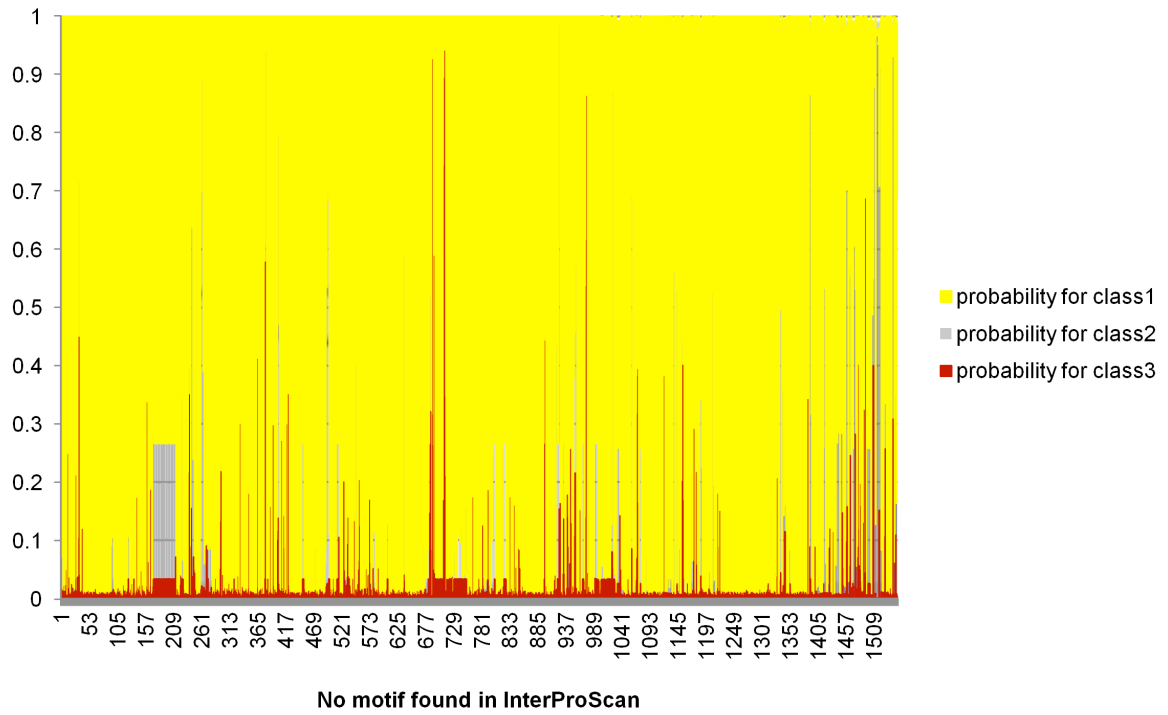

**(E)**

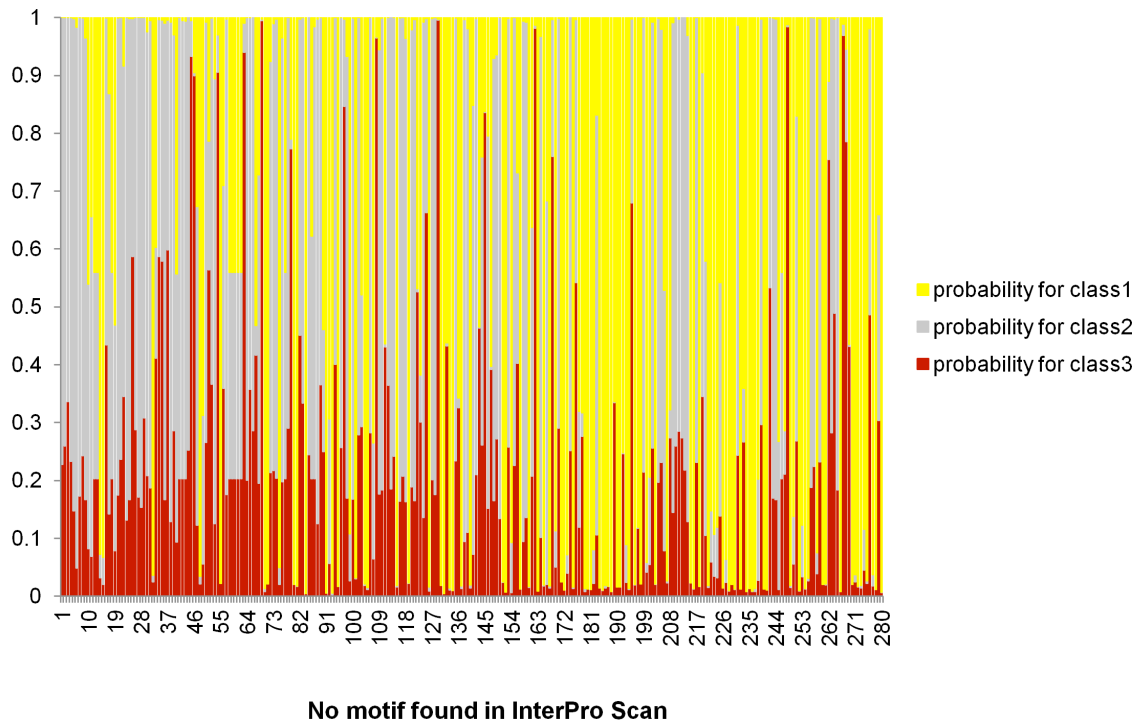



**(F)**

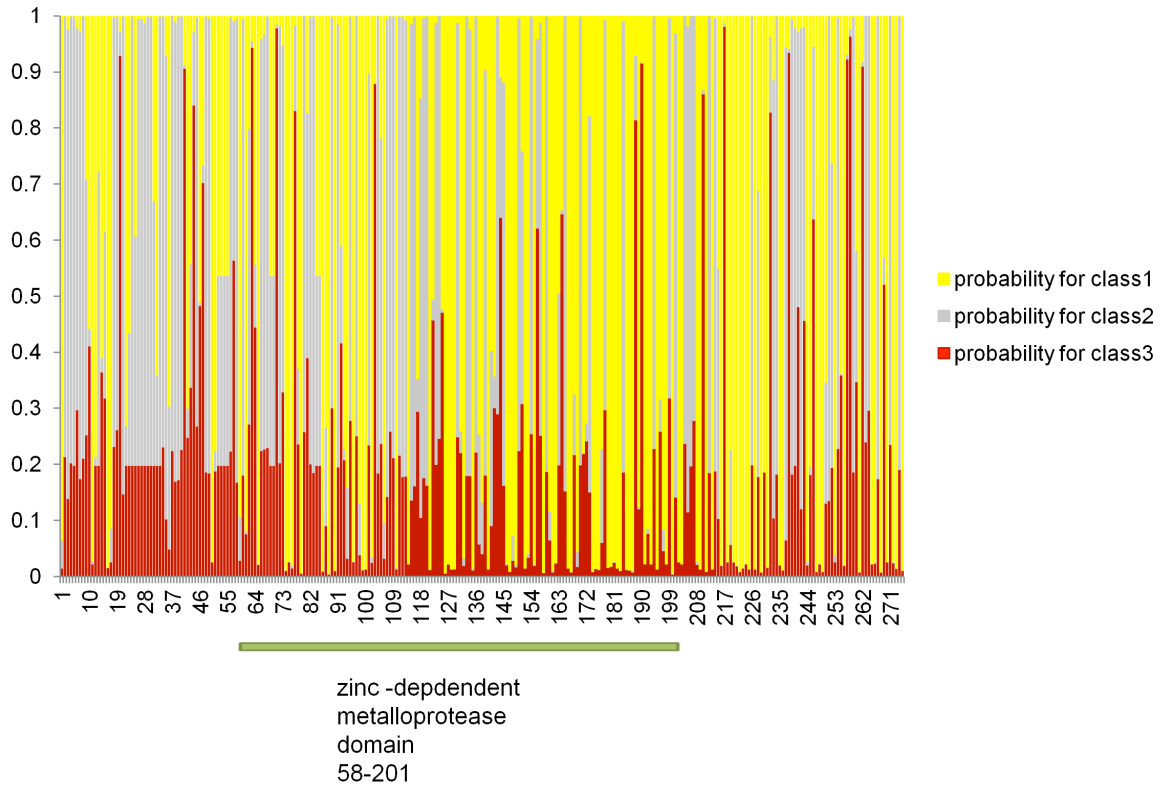

**(G)**

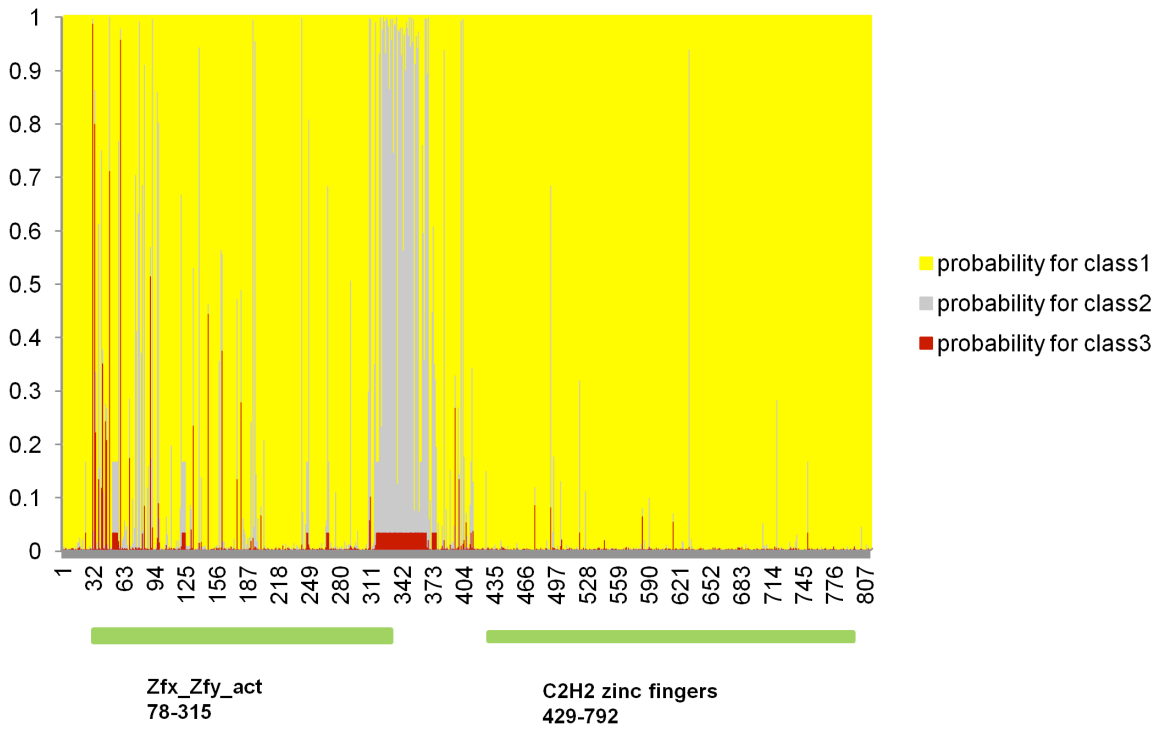

**(H)**

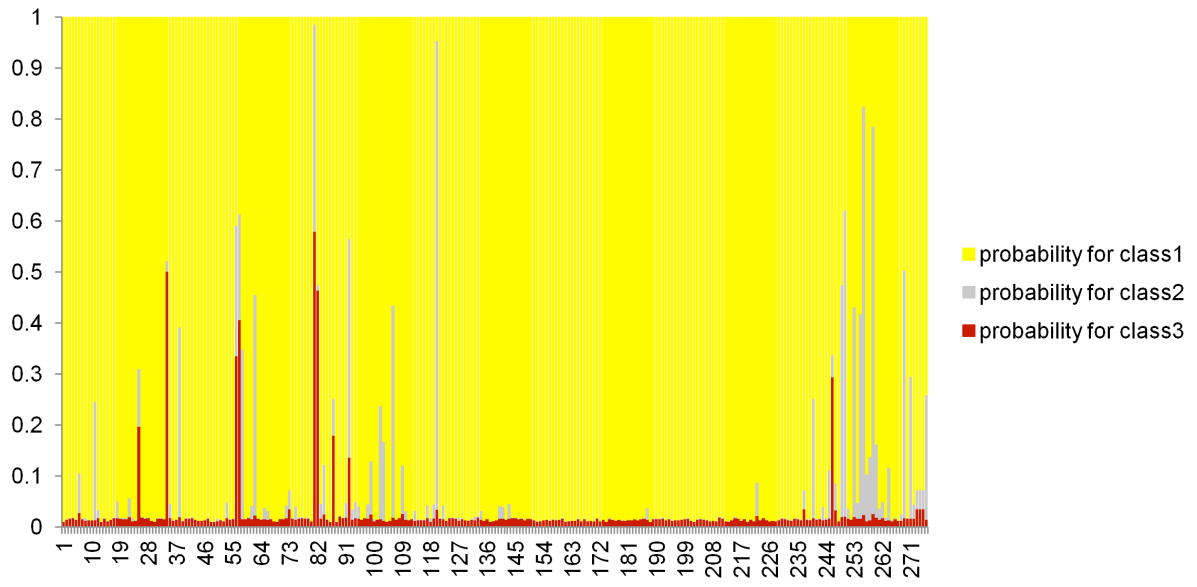

**Supplementary Figure 6: Analysis of paralog retention rate after the teleost genome duplication (TGD)**

(A) Venn diagram of three partially overlapping gene classes (cognition, pigmentation, liver) analyzed for TGD paralog retention. Numbers indicate genes analyzed and (in brackets) number of genes still present in two copies in at least one of the seven teleost genomes. (B) TGD paralog retention rate for the three gene classes for zebrafish (*Danio rerio*, Dre), Atlantic cod (*Gadus morhua*, Gmo), stickleback (*Gasterosteus aculeatus*, Gac), two pufferfishes (*Tetraodon nigroviridis*, Tni; *Takifugu rubripes*, Tru), medaka (*Oryzias latipes*, Ola), platyfish (*Xiphophorus maculatus*, Xma), and their inferred teleost ancestor (tel. anc.).

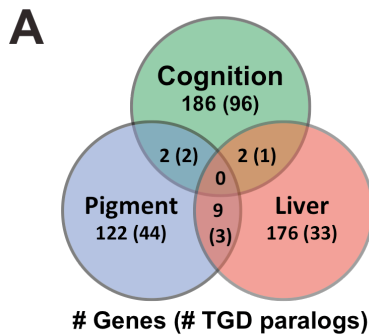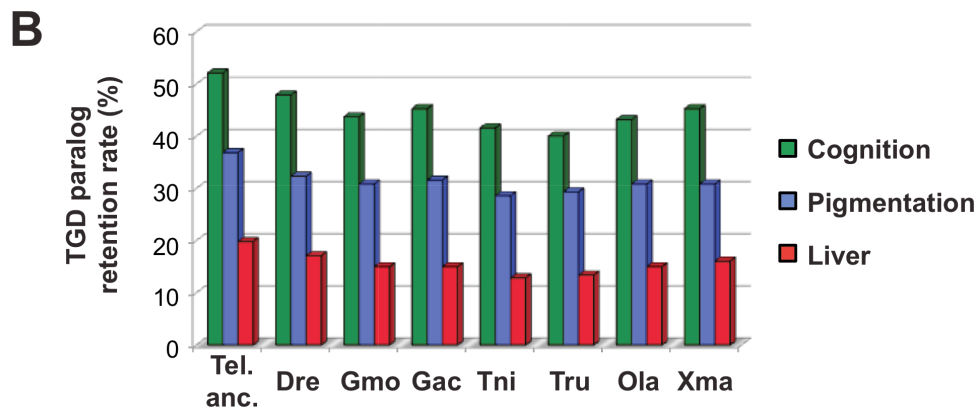

**Supplementary Figure 7: Protein length analysis**

(A) Retained TGD paralogs vs. singletons. (B) Functional categories.

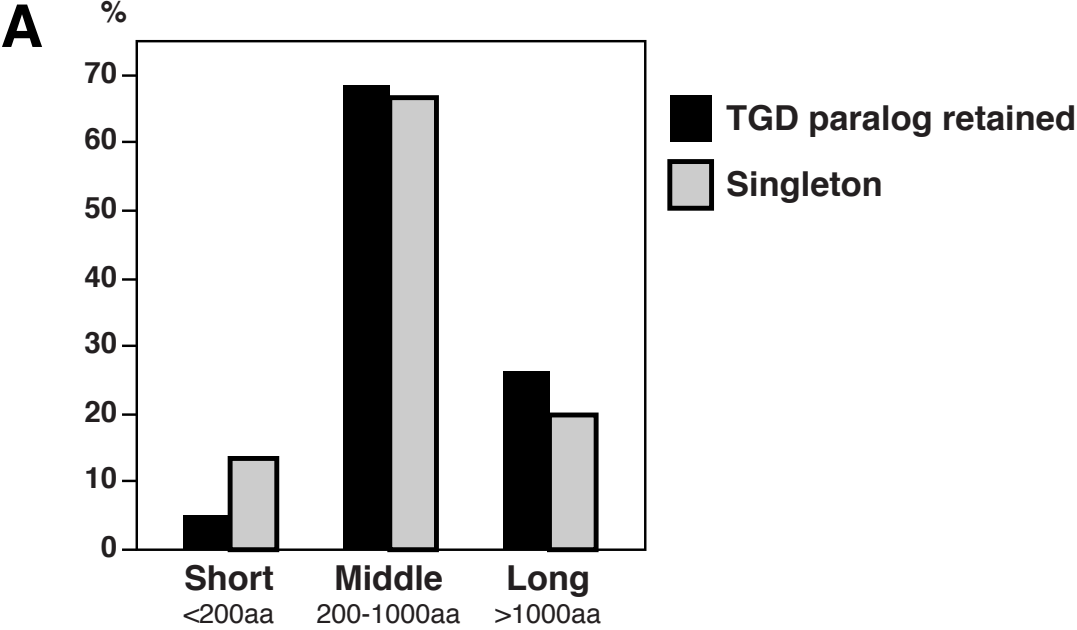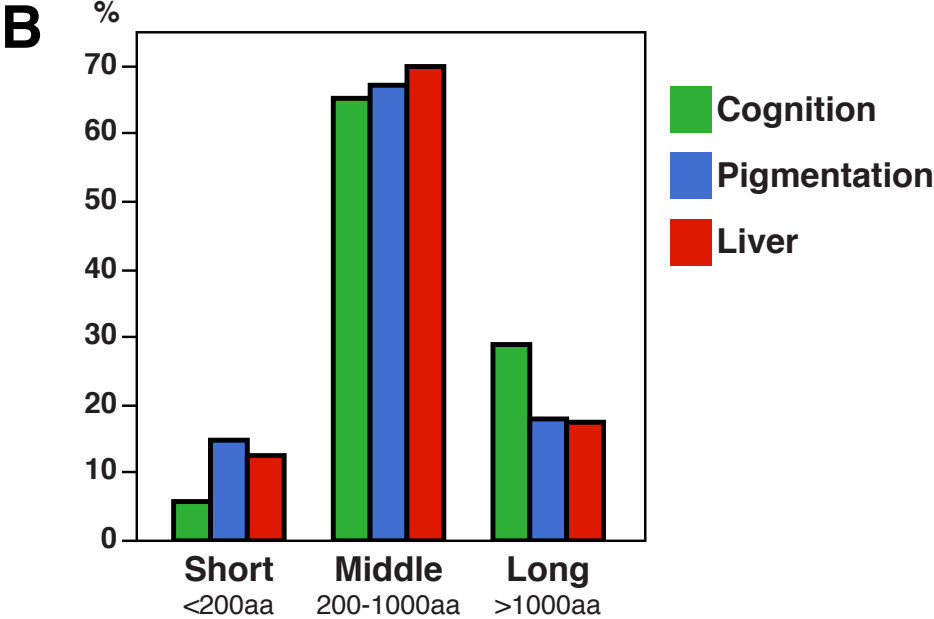

**Supplementary Figure 8: Whole genome assembled scaffold distribution by base length.**

1 Each scaffold represents individual contigs joined by long distance paired sequences.

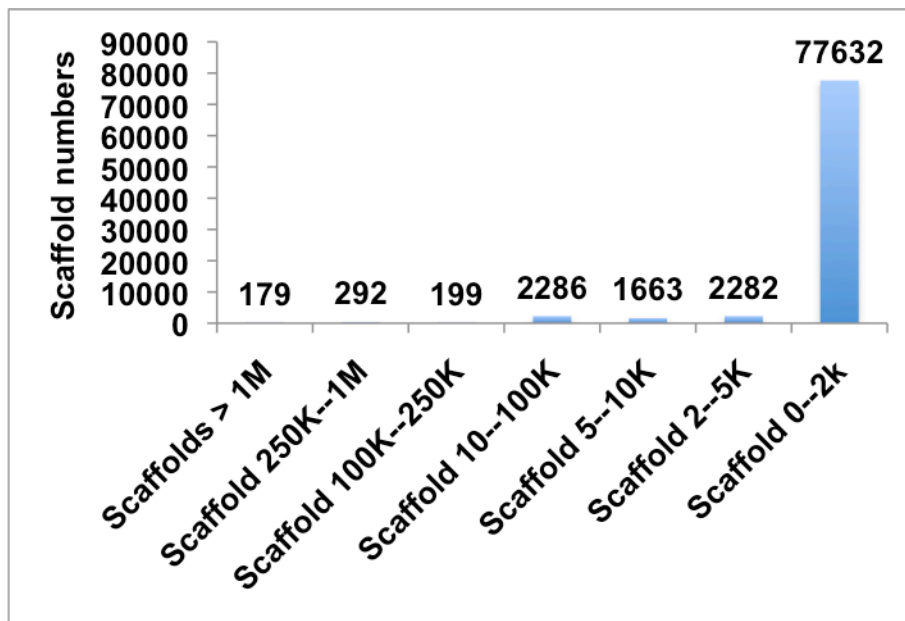

2  
3  
4

**Supplementary Figure 9: Species tree used for the PHRINGE analysis.**

5 Numerals in parentheses are taxon IDs. Other numerals are cluster levels. Cluster levels 12-23 are  
6 internal to each genome.

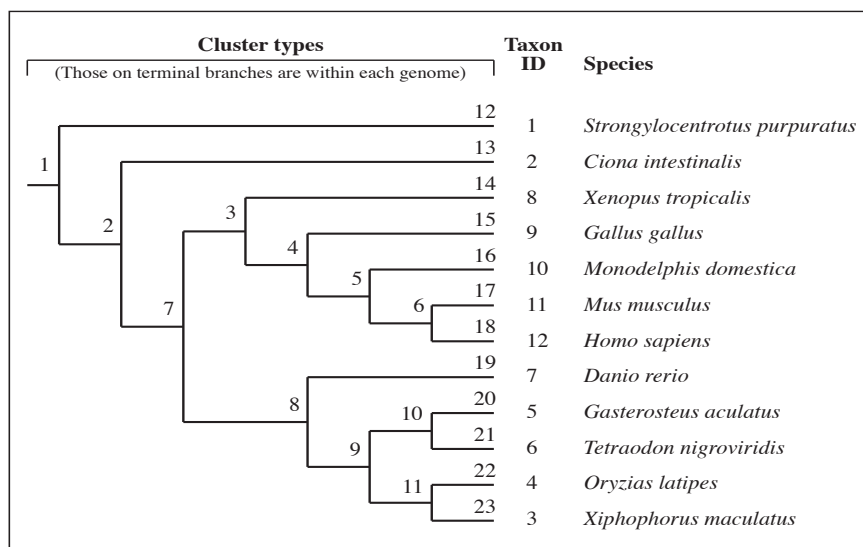

## SUPPLEMENTARY REFERENCES

- 1 1. Huang, X., Wang, J., Aluru, S., Yang, S.P. & Hillier, L. PCAP: a whole-genome  
2 assembly program. *Genome research* **13**, 2164-70 (2003).
- 3 2. Lamatsch, D.K., Steinlein, C., Schmid, M. & Scharl, M. Noninvasive determination  
4 of genome size and ploidy level in fishes by flow cytometry: detection of triploid  
5 *Poecilia formosa*. *Cytometry* **39**, 91-5 (2000).
- 6 3. Tiersch, T.R., Chandler, R.W., Kallman, K.D. & Wachtel, S.S. Estimation of nuclear  
7 DNA content by flow cytometry in fishes of the genus *Xiphophorus*. *Comparative*  
8 *biochemistry and physiology. B, Comparative biochemistry* **94**, 465-8 (1989).
- 9 4. Garcia, T.I. *et al.* Effects of short read quality and quantity on a de novo vertebrate  
10 transcriptome assembly. *Comp Biochem Physiol C Toxicol Pharmacol* **155**, 95-101  
11 (2012).
- 12 5. Langmead, B., Trapnell, C., Pop, M. & Salzberg, S.L. Ultrafast and memory-efficient  
13 alignment of short DNA sequences to the human genome. *Genome Biology* **10**,  
14 R25 (2009).
- 15 6. Zerbino, D.R. & Birney, E. Velvet: algorithms for de novo short read assembly  
16 using de Bruijn graphs. *Genome Res* **18**, 821-9 (2008).
- 17 7. Trapnell, C., Pachter, L. & Salzberg, S.L. TopHat: discovering splice junctions with  
18 RNA-Seq. *Bioinformatics* **25**, 1105-11 (2009).
- 19 8. Trapnell, C. *et al.* Transcript assembly and quantification by RNA-Seq reveals  
20 unannotated transcripts and isoform switching during cell differentiation. *Nature*  
21 *Biotechnology* **28**, 511-5 (2010).
- 22 9. Stanke, M. & Waack, S. Gene prediction with a hidden Markov model and a new  
23 intron submodel. *Bioinformatics* **19 Suppl 2**, ii215-25 (2003).
- 24 10. Kent, W.J. BLAT - the BLAST-like alignment tool. *Genome Research* **12**, 656-64  
25 (2002).
- 26 11. Schulz, M.H., Zerbino, D.R., Vingron, M. & Birney, E. Oases: robust de novo RNA-  
27 seq assembly across the dynamic range of expression levels. *Bioinformatics* **28**,  
28 1086-92 (2012).
- 29 12. Altschul, S.F., Gish, W., Miller, W., Myers, E.W. & Lipman, D.J. Basic local alignment  
30 search tool. *Journal of Molecular Biology* **215**, 403-10 (1990).
- 31 13. Camacho, C. *et al.* BLAST+: architecture and applications. *BMC Bioinformatics* **10**,  
32 421 (2009).
- 33 14. Wu, T.D. & Watanabe, C.K. GMAP: a genomic mapping and alignment program for  
34 mRNA and EST sequences. *Bioinformatics* **21**, 1859-75 (2005).
- 35 15. Wicker, T. *et al.* The repetitive landscape of the chicken genome. *Genome*  
36 *Research* **15**, 126-36 (2005).
- 37 16. Aparicio, S. *et al.* Whole-genome shotgun assembly and analysis of the genome of  
38 *Fugu rubripes*. *Science* **297**, 1301-10 (2002).
- 39 17. Catchen, J.M., Conery, J.S. & Postlethwait, J.H. Automated identification of  
40 conserved synteny after whole-genome duplication. *Genome Research* **19**, 1497-  
41 505 (2009).
- 42 18. Walter, R.B. *et al.* A microsatellite genetic linkage map for *Xiphophorus*. *Genetics*  
43 **168**, 363-72 (2004).
- 44 19. Wu, T.D. & Nacu, S. Fast and SNP-tolerant detection of complex variants and  
45 splicing in short reads. *Bioinformatics* **26**, 873-81 (2010).
- 46 20. Kent, W.J. BLAT--the BLAST-like alignment tool. *Genome Research* **12**, 656-64  
47 (2002).

- 1 21. Drummond, A.J. *et al.* Geneious v5.5. Available from <http://www.geneious.com>  
2 (2010).
- 3 22. Yang, Z., Wong, W.S. & Nielsen, R. Bayes empirical bayes inference of amino acid  
4 sites under positive selection. *Molecular Biology and Evolution* **22**, 1107-18  
5 (2005).
- 6 23. Braasch, I. & Postlethwait, J.H.I.e. Polyploidy in fish and the teleost genome  
7 duplication. in *Polyploidy and Genome Evolution* (eds. Soltis, P.S. & Soltis, D.E.) in  
8 press (Springer, 2012).
- 9 24. Papp, B., Pal, C. & Hurst, L.D. Dosage sensitivity and the evolution of gene families  
10 in yeast. *Nature* **424**, 194-7 (2003).
- 11 25. Makino, T. & McLysaght, A. Ohnologs in the human genome are dosage balanced  
12 and frequently associated with disease. *PNAS U.S.A.* **107**, 9270-4 (2010).
- 13 26. Brown, K.H. *et al.* Extensive genetic diversity and substructuring among zebrafish  
14 strains revealed through copy number variant analysis. *PNAS U.S.A.* **109**, 529-34  
15 (2012).
- 16 27. Sato, Y., Hashiguchi, Y. & Nishida, M. Temporal pattern of loss/persistence of  
17 duplicate genes involved in signal transduction and metabolic pathways after  
18 teleost-specific genome duplication. *BMC Evolutionary Biology* **9**, 127 (2009).
- 19 28. Braasch, I., Brunet, F., Volff, J.N. & Schartl, M. Pigmentation pathway evolution  
20 after whole-genome duplication in fish. *Genome Biology and Evolution*, 479-493  
21 (2009).
- 22 29. Volff, J.N., Bouneau, L., Ozouf-Costaz, C. & Fischer, C. Diversity of  
23 retrotransposable elements in compact pufferfish genomes. *Trends in genetics :*  
24 *TIG* **19**, 674-8 (2003).
- 25 30. Shirak, A. *et al.* Identification of repetitive elements in the genome of  
26 *Oreochromis niloticus*: tilapia repeat masker. *Marine Biotechnology* **12**, 121-5  
27 (2010).
- 28 31. Consortium, I.C.G.S. Sequence and comparative analysis of the chicken genome  
29 provide unique perspectives on vertebrate evolution. *Nature* **432**, 695-716  
30 (2004).
- 31 32. Ivics, Z., Izsvák, Z. & Hackett, P.B. Repeated sequence elements in zebrafish and  
32 their use in molecular genetic studies. *The Zebrafish Science Monitor* **3**(1995).
- 33 33. Waterston, R.H. *et al.* Initial sequencing and comparative analysis of the mouse  
34 genome. *Nature* **420**, 520-62 (2002).
- 35 34. Davidson, W.S. *et al.* Sequencing the genome of the Atlantic salmon (*Salmo salar*).  
36 *Genome Biology* **11**, 403 (2010).
- 37 35. Carroll, D., Knutzon, D.S. & Garrett, J.E. Transposable elements in *Xenopus*  
38 species. in *Mobile DNA* (eds. **Howe, M.** & **Berg, D.**) 567-574 (1989).
- 39 36. Consortium, I.H.G.S. *et al.* Initial sequencing and analysis of the human genome.  
40 *Nature* **409**, 860-921 (2001).
- 41 37. Shibata, Y. *et al.* Identification and cDNA cloning of alveolin, an extracellular  
42 metalloproteinase, which induces chorion hardening of medaka (*Oryzias latipes*)  
43 eggs upon fertilization. *J Biol Chem* **275**, 8349-54 (2000).
- 44 38. Romano, M., Rosanova, P., Anteo, C. & Limatola, E. Vertebrate yolk proteins: a  
45 review. *Mol Reprod Dev* **69**, 109-16 (2004).
- 46 39. Beck, F., Erler, T., Russell, A. & James, R. Expression of Cdx-2 in the mouse embryo  
47 and placenta: possible role in patterning of the extra-embryonic membranes. *Dev*  
48 *Dyn* **204**, 219-27 (1995).

- 1 40. Kudo, N., Yasumasu, S., Iuchi, I. & Tanokura, M. Crystallization and preliminary X-  
2 ray analysis of HCE-1, a hatching enzyme of medaka fish, *Oryzias latipes*. *Acta*  
3 *Crystallogr D Biol Crystallogr* **60**, 725-6 (2004).
- 4 41. Rinkenberger, J.L., Cross, J.C. & Werb, Z. Molecular genetics of implantation in the  
5 mouse. *Dev Genet* **21**, 6-20 (1997).
- 6 42. Hanaoka, R. *et al.* Zebrafish *gcmb* is required for pharyngeal cartilage formation.  
7 *Mech Dev* **121**, 1235-47 (2004).
- 8 43. Paulesu, L. *et al.* Evidence of H beta 58, a gene involved in mammalian placental  
9 development, in the three-toed skink, *Chalcides chalcides* (Squamata: Scincidae),  
10 a viviparous placentotrophic reptile. *Placenta* **22**, 735-41 (2001).
- 11 44. Cross, J.C. *et al.* Genes, development and evolution of the placenta. *Placenta* **24**,  
12 123-30 (2003).
- 13 45. Guillemot, F., Nagy, A., Auerbach, A., Rossant, J. & Joyner, A.L. Essential role of  
14 Mash-2 in extraembryonic development. *Nature* **371**, 333-6 (1994).
- 15 46. Hou, Z., Romero, R., Uddin, M., Than, N.G. & Wildman, D.E. Adaptive history of  
16 single copy genes highly expressed in the term human placenta. *Genomics* **93**, 33-  
17 41 (2009).
- 18 47. Barak, Y. *et al.* PPAR gamma is required for placental, cardiac, and adipose tissue  
19 development. *Mol Cell* **4**, 585-95 (1999).
- 20 48. Koh, D., Inohaya, K., Imai, Y. & Kudo, A. The novel medaka transglutaminase gene  
21 is expressed in developing yolk veins. *Gene Expr Patterns* **4**, 263-6 (2004).
- 22 49. Zhang, Z.B. *et al.* [Gene cloning, sequence analysis and tissue expression of  
23 estrogen-related receptor alpha (Erralpha) in Japanese medaka and its  
24 transcriptional responses after differential EDCs exposure]. *Huan Jing Ke Xue* **29**,  
25 3153-8 (2008).
- 26 50. Hyllner, S.J., Westerlund, L., Olsson, P.E. & Schopen, A. Cloning of rainbow trout  
27 egg envelope proteins: members of a unique group of structural proteins. *Biol*  
28 *Reprod* **64**, 805-11 (2001).
- 29 51. Kanamori, A., Naruse, K., Mitani, H., Shima, A. & Hori, H. Genomic organization of  
30 ZP domain containing egg envelope genes in medaka (*Oryzias latipes*). *Gene* **305**,  
31 35-45 (2003).
- 32 52. Fu, X. *et al.* Estimating accuracy of RNA-Seq and microarrays with proteomics.  
33 *BMC Genomics* **10**, 161 (2009).
- 34 53. Galtier, N., Gouy, M. & Gautier, C. SEAVIEW and PHYLO\_WIN: two graphic tools  
35 for sequence alignment and molecular phylogeny. *Comput Appl Biosci* **12**, 543-  
36 548 (1996).

37
